# Supplementary material for: Green Walkability and Physical Activity in UK Biobank: A Cross-Sectional Analysis of Adults in Greater London
Source: MDPI journal article supplement (doi:10.3390/ijerph19074247), 2022-04-02
Supplement: s1 [file s1]

## **Supplementary Material – Green walkability and physical activity in UK Biobank**

### **Contents**

**Table S1:** Ordnance Survey Points of Interest (POI) categories used in *walkability* and *green walkability* index to represent density of potential destinations surround each UK Biobank participant residential address.

**Table S2-S17:** Table 1 by quintiles of walkability, green walkability, ground-cover walkability and tree-cover walkability for UK Biobank participants in the samples for the IPAQ based self-reported analyses (n = 57,726), accelerometer measured physical activity (n = 12,986), non-commute transport (n = 45,181) and commuting transport analyses (n = 24,102).

**Table S1: Ordnance Survey Points of Interest (POI) categories used in *walkability* and *green walkability* index to represent density of potential destinations around each UK Biobank participant residential address.**

| <b>Group</b>                                 | <b>Category</b>                                  | <b>Class</b>                                                |
|----------------------------------------------|--------------------------------------------------|-------------------------------------------------------------|
| <b>01 Accomodations, eating and drinking</b> | 02 Eating and drinking                           | 0012 Banqueting and function rooms                          |
|                                              |                                                  | 0013 Cafes, snack bars and tea rooms                        |
|                                              |                                                  | 0018 Fast food and takeaway outlets                         |
|                                              |                                                  | 0019 Fast food delivery services                            |
|                                              |                                                  | 0020 Fish and chip shops                                    |
|                                              |                                                  | 0025 Internet cafes                                         |
|                                              |                                                  | 0034 Pubs, bars and inns                                    |
|                                              |                                                  | 0043 Restaurants                                            |
| <b>02 Commercial Services</b>                | 08 IT, advertising, marketing and media services | 0130 Printing and photocopying services                     |
|                                              |                                                  |                                                             |
|                                              | 09 Legal and financial                           | 0138 Banks and building societies                           |
|                                              |                                                  | 0141 Cash machines                                          |
|                                              |                                                  | 0140 Currency conversion and money transfers                |
|                                              |                                                  | 0151 Pawnbrokers                                            |
|                                              |                                                  | 0154 Solicitors, advocates and notaries public              |
|                                              |                                                  | 0112 Event ticket agents and box office                     |
|                                              | 10 Personal, consumer and other services         | 0156 Hair and beauty services                               |
|                                              |                                                  | 0822 Slimming clubs and services                            |
|                                              |                                                  | 0821 Spas                                                   |
|                                              |                                                  | 0179 Sports services                                        |
|                                              |                                                  | 0776 Tailoring and clothing alteration                      |
|                                              |                                                  |                                                             |
| <b>03 Attractions</b>                        | 58 Bodies of water                               | 0804 Lakes and waters                                       |
|                                              |                                                  | 0805 Lochs and lochans                                      |
|                                              |                                                  | 0803 Ponds                                                  |
|                                              |                                                  | 0807 Reservoirs                                             |
|                                              |                                                  | 0808 Settling, balancing and silt ponds                     |
|                                              |                                                  | 0806 Tarns, pools and meres                                 |
|                                              | 16 Botanical and zoological                      | 0231 Aquaria and sea life centres                           |
|                                              |                                                  | 0232 Bird reserves, collections and sanctuaries             |
|                                              |                                                  | 0233 Butterfly farms                                        |
|                                              |                                                  | 0235 Farm based attractions                                 |
|                                              |                                                  | 0236 Horticultural attractions                              |
|                                              |                                                  | 0237 Salmon ladders                                         |
|                                              | 17 Historical and cultural                       | 0239 Zoos and animal collections                            |
|                                              |                                                  | 0240 Archaeological sites                                   |
|                                              |                                                  | 0813 Art galleries                                          |
|                                              |                                                  | 0241 Battlefields                                           |
|                                              |                                                  | 0245 Historic and ceremonial structures                     |
|                                              |                                                  | 0244 Historic buildings including castles, forts and abbeys |
|                                              |                                                  | 0246 Historical ships                                       |
|                                              |                                                  | 0248 Museums                                                |
|                                              | 19 Landscape features                            | 0257 Designated scenic features 0259 Trigonometric points   |
|                                              | 18 Recreational                                  | 0252 Commons                                                |
|                                              |                                                  | 0253 Country and National Parks                             |

|                            |                                             |                                                            |
|----------------------------|---------------------------------------------|------------------------------------------------------------|
|                            |                                             | 0814 Municipal parks and gardens                           |
|                            |                                             | 0254 Picnic areas                                          |
|                            |                                             | 0255 Playgrounds                                           |
|                            | 20 Tourism                                  | 0268 Information centres                                   |
|                            |                                             | 0263 Laseria, observatories and planetaria                 |
|                            |                                             | 0264 Model villages                                        |
|                            |                                             | 0265 Railways (heritage, steam and miniature)              |
|                            |                                             | 0267 Siteseeing, tours, viewing and visitor centres        |
|                            |                                             | 0266 Theme and adventure parks                             |
|                            |                                             | 0269 Unspecified and other attractions                     |
| 04 Sport and entertainment | 22 Gambling                                 | 0277 Amusement parks and arcades                           |
|                            |                                             | 0278 Bingo halls                                           |
|                            |                                             | 0279 Bookmakers                                            |
|                            |                                             | 0280 Casinos                                               |
|                            |                                             | 0281 Pools promoters                                       |
|                            | 23 Outdoor pursuits                         | 0282 Angling and sports fishing                            |
|                            |                                             | 0283 Combat, laser and paintball games                     |
|                            |                                             | 0284 Hot air ballooning                                    |
|                            |                                             | 0770 Outdoor pursuit organisers and equipment              |
|                            |                                             | 0285 Parachuting and bungee jumping                        |
|                            |                                             | 0286 Paragliding and hang gliding                          |
|                            |                                             | 0321 Riding schools, livery stables and equestrian centres |
|                            |                                             | 0287 Watersports                                           |
|                            | 21 Sport and entertainment support services | 0271 Children's activity centres                           |
|                            |                                             | 0273 Entertainment services                                |
|                            |                                             | 0274 Firework related services                             |
|                            |                                             | 0275 Funfair services                                      |
|                            |                                             | 0276 Mobile discos                                         |
|                            |                                             | 0820 Motorsport services                                   |
|                            | 24 Sports complex                           | 0289 Athletics facilities                                  |
|                            |                                             | 0290 Bowling facilities                                    |
|                            |                                             | 0291 Climbing facilities                                   |
|                            |                                             | 0292 Golf ranges, courses, clubs and professionals         |
|                            |                                             | 0293 Gymnasiums, sports halls and leisure centres          |
|                            |                                             | 0294 Ice rinks                                             |
|                            |                                             | 0297 Motorsport venues                                     |
|                            |                                             | 0298 Racecourses and greyhound tracks                      |
|                            |                                             | 0299 Shooting facilities                                   |
|                            |                                             | 0300 Ski infrastructure and aerial cableways               |
|                            |                                             | 0301 Snooker and pool halls                                |
|                            |                                             | 0302 Sports grounds, stadia and pitches                    |
|                            |                                             | 0303 Squash courts                                         |
|                            |                                             | 0304 Swimming pools                                        |
|                            |                                             | 0305 Tennis facilities                                     |
|                            |                                             | 0306 Velodromes                                            |
|                            | 25 Venues, stage and screen                 | 0825 Adult venues                                          |
|                            |                                             | 0308 Cinemas                                               |
|                            |                                             | 0762 Conference and exhibition centres                     |
|                            |                                             | 0311 Discos                                                |
|                            |                                             | 0312 Nightclubs                                            |
|                            |                                             | 0314 Social clubs                                          |
|                            |                                             | 0315 Theatres and concert halls                            |
| 05 Education and health    | 26 Animal welfare                           | 0316 Animal clipping and grooming                          |
|                            |                                             | 0317 Dog training                                          |
|                            |                                             | 0318 Horse training                                        |
|                            |                                             | 0319 Kennels and catteries                                 |

|  |                                              |                                                    |
|--|----------------------------------------------|----------------------------------------------------|
|  |                                              | 0320 Pet cemeteries and crematoria                 |
|  |                                              | 0322 Veterinarians and animal hospitals            |
|  |                                              | 0323 Veterinary pharmacies                         |
|  | 27 Education support services                | 0324 Education authorities                         |
|  |                                              | 0325 Education services                            |
|  |                                              | 0326 Examination boards                            |
|  |                                              | 0799 Playing for success centres                   |
|  |                                              | 0800 Secure units                                  |
|  | 28 Health practitioners and establishments   | 0780 Accident and emergency hospitals              |
|  |                                              | 0330 Alternative, natural and complementary        |
|  |                                              | 0364 Chemists and pharmacies                       |
|  |                                              | 0365 Clinics and health centres                    |
|  |                                              | 0815 Day and care centres                          |
|  |                                              | 0367 Dental and medical laboratories               |
|  |                                              | 0368 Dental surgeries                              |
|  |                                              | 0335 Dental technicians                            |
|  |                                              | 0337 Dieticians and nutritionists                  |
|  |                                              | 0369 Doctors surgeries                             |
|  |                                              | 0333 Foot related services                         |
|  |                                              | 0340 Homeopaths                                    |
|  |                                              | 0370 Hospices                                      |
|  |                                              | 0371 Hospitals                                     |
|  |                                              | 0372 Mental health centres and practitioners       |
|  |                                              | 0342 Midwifery                                     |
|  |                                              | 0373 Nursing and residential care homes            |
|  |                                              | 0344 Optometrists and opticians                    |
|  |                                              | 0809 Parenting and childcare services              |
|  |                                              | 0345 Physical therapy                              |
|  |                                              | 0352 Speech therapists                             |
|  |                                              | 0354 Surgeons and cosmetic surgeries               |
|  |                                              | 0812 Walk-in centre                                |
|  |                                              | 29 Health support services                         |
|  |                                              | 0356 Ambulance and medical transportation services |
|  |                                              | 0357 Blood transfusion service                     |
|  |                                              | 0358 Counselling and advice services               |
|  |                                              | 0359 Health authorities                            |
|  |                                              | 0106 Medical equipment rental and leasing          |
|  |                                              | 0361 Medical waste disposal services               |
|  |                                              | 0362 Pregnancy related services and help centres   |
|  |                                              | 0363 X-ray services                                |
|  | 31 Primary, secondary and tertiary education | 0379 Broad age range and secondary state schools   |
|  |                                              | 0375 First, primary and infant schools             |
|  |                                              | 0376 Further education establishments              |
|  |                                              | 0381 Higher education establishments               |
|  |                                              | 0377 Independent and preparatory schools           |
|  |                                              | 0801 Pupil referral units                          |
|  |                                              | 0380 Special schools and colleges                  |
|  |                                              | 0382 Unspecified and other schools                 |
|  | 32 Recreational and vocational education     | 0384 Ballet and dance schools                      |
|  |                                              | 0385 Beauty and hairdressing schools               |
|  |                                              | 0388 Diving schools                                |
|  |                                              | 0389 Drama schools                                 |
|  |                                              | 0390 Driving and motorcycle schools                |
|  |                                              | 0391 First aid training                            |
|  |                                              | 0392 Flying schools                                |
|  |                                              | 0394 Language schools                              |
|  |                                              | 0395 Martial arts instruction                      |
|  |                                              | 0396 Music teachers and schools                    |

|                                 |                                      |                                                                |
|---------------------------------|--------------------------------------|----------------------------------------------------------------|
|                                 |                                      | 0397 Nursery schools and pre and after school care             |
|                                 |                                      | 0399 Sailing schools                                           |
|                                 |                                      | 0400 Sports and fitness coaching                               |
|                                 |                                      | 0403 Training providers and centres                            |
| <b>06 Public Infrastructure</b> | 34 Infrastructure and facilities     | 0453 Allotments                                                |
|                                 |                                      | 0454 Cemeteries and crematoria                                 |
|                                 |                                      | 0456 Halls and community centres                               |
|                                 |                                      | 0457 Letter boxes                                              |
|                                 |                                      | 0458 Libraries                                                 |
|                                 |                                      | 0459 Places of worship                                         |
|                                 | 35 Organisations                     | 0769 Community networks and projects                           |
|                                 |                                      | 0448 Institutes and professional organisations                 |
|                                 |                                      | 0449 Political parties and related organisations               |
|                                 |                                      | 0450 Religious organisations                                   |
|                                 |                                      | 0447 Sports clubs and associations                             |
|                                 |                                      | 0452 Youth Organisations                                       |
| <b>09 Retail</b>                | 46 Clothing and accessories          | 0797 Baby and nursery equipment and children's clothes         |
|                                 |                                      | 0656 Clothing                                                  |
|                                 |                                      | 0657 Footwear                                                  |
|                                 |                                      | 0659 Jewellery and fashion accessories                         |
|                                 |                                      | 0660 Lingerie and hosiery                                      |
|                                 | 47 Food, drink and multi item retail | 0671 Alcoholic drinks including off licences and               |
|                                 |                                      | wholesalers                                                    |
|                                 |                                      | 0661 Bakeries                                                  |
|                                 |                                      | 0662 Butchers                                                  |
|                                 |                                      | 0768 Cash and carry                                            |
|                                 |                                      | 0663 Confectioners                                             |
|                                 |                                      | 0699 Convenience stores and independent supermarkets           |
|                                 |                                      | 0665 Delicatessens                                             |
|                                 |                                      | 0666 Fishmongers                                               |
|                                 |                                      | 0667 Frozen foods                                              |
|                                 |                                      | 0668 Green and new age goods                                   |
|                                 |                                      | 0669 Grocers, farm shops and pick your own                     |
|                                 |                                      | 0670 Herbs and spices                                          |
|                                 |                                      | 0703 Livestock markets                                         |
|                                 |                                      | 0705 Markets                                                   |
|                                 |                                      | 0672 Organic, health, gourmet and kosher foods                 |
|                                 |                                      | 0819 Supermarket chains                                        |
|                                 |                                      | 0798 Tea and coffee merchants                                  |
|                                 |                                      | 48 Household, office, leisure and garden                       |
|                                 |                                      | 0824 Adult shops                                               |
|                                 |                                      | 0712 Art and antiques                                          |
|                                 |                                      | 0674 Books and maps                                            |
|                                 |                                      | 0693 Camping and caravanning                                   |
|                                 |                                      | 0675 Carpets, rugs, soft furnishings and needlecraft           |
|                                 |                                      | 0714 Charity shops                                             |
|                                 |                                      | 0676 China and glassware                                       |
|                                 |                                      | 0827 Comic bookshops                                           |
|                                 |                                      | 0828 Computer shops                                            |
|                                 |                                      | 0720 Computer supplies                                         |
|                                 |                                      | 0677 Cosmetics, toiletries, perfumes and hairdressing supplies |
|                                 |                                      | 0678 Craft supplies                                            |
|                                 |                                      | 0679 Cycles and accessories                                    |
|                                 |                                      | 0700 Department stores                                         |
|                                 |                                      | 0701 Discount stores                                           |
|                                 |                                      | 0680 DIY and home improvement                                  |

|              |                                                  |                                                       |
|--------------|--------------------------------------------------|-------------------------------------------------------|
|              |                                                  | 0721 Domestic appliances                              |
|              |                                                  | 0722 Electrical goods and components                  |
|              |                                                  | 0716 Florists                                         |
|              |                                                  | 0766 Fuel distributors and suppliers                  |
|              |                                                  | 0682 Furniture                                        |
|              |                                                  | 0764 Garages, garden and portable buildings           |
|              |                                                  | 0683 Garden centres and nurseries                     |
|              |                                                  | 0684 Garden machinery and furniture                   |
|              |                                                  | 0685 General household goods                          |
|              |                                                  | 0717 Gifts and cards                                  |
|              |                                                  | 0686 Hobby, sports and pastime products               |
|              |                                                  | 0687 Leather goods, luggage and travel accessories    |
|              |                                                  | including handbags                                    |
|              |                                                  | 0688 Lighting                                         |
|              |                                                  | 0704 Mail order and catalogue stores                  |
|              |                                                  | 0689 Music and video                                  |
|              |                                                  | 0690 Musical instruments                              |
|              |                                                  | 0718 Party goods and novelties                        |
|              |                                                  | 0691 Pets, supplies and services                      |
|              |                                                  | 0724 Photographic and optical equipment               |
|              |                                                  | 0763 Post Offices                                     |
|              |                                                  | 0831 Potteries                                        |
|              |                                                  | 0719 Second hand goods                                |
|              |                                                  | 0708 Shopping centres and retail parks                |
|              |                                                  | 0725 Stationery and office supplies                   |
|              |                                                  | 0710 Surplus goods                                    |
|              |                                                  | 0726 Telephones and telephone cards                   |
|              |                                                  | 0694 Travel agencies                                  |
|              | 49 Motoring                                      | 0695 New vehicles                                     |
|              |                                                  | 0696 Second hand vehicles                             |
|              |                                                  | 0697 Vehicle auctions                                 |
|              |                                                  | 0698 Vehicle parts and accessories                    |
| 10 Transport | 59 Bus transport                                 | 0732 Bus stops                                        |
|              |                                                  | 0759 Hail and ride zones                              |
|              | 57 Public transport, stations and infrastructure | 0731 Bus and coach stations, depots and companies*    |
|              |                                                  | 0794 London Underground entrances                     |
|              |                                                  | 0738 Railway stations, junctions and halts*           |
|              |                                                  | 0758 Taxi ranks                                       |
|              |                                                  | 0756 Tram, metro and light railway stations and stops |
|              |                                                  | 0761 Underground network stations                     |

\* only those including the word "station" were retained.

**Table S2:** Baseline characteristics of UK Biobank participants (n = 57,726) by quintiles of *walkability*; all study participants resided within Greater London administrative boundaries at study baseline (2006-2010).

|                                                         | Walkability Quintiles |              |              |              |              |
|---------------------------------------------------------|-----------------------|--------------|--------------|--------------|--------------|
|                                                         | Q1                    | Q2           | Q3           | Q4           | Q5           |
|                                                         | (N=11546)             | (N=11545)    | (N=11545)    | (N=11545)    | (N=11545)    |
| <b>Age at baseline (years)</b>                          |                       |              |              |              |              |
| Mean (SD)                                               | 57.5 (7.88)           | 56.4 (8.25)  | 55.7 (8.21)  | 55.2 (8.34)  | 55.0 (8.24)  |
| <b>Sex</b>                                              |                       |              |              |              |              |
| Female                                                  | 6495 (56.3%)          | 6427 (55.7%) | 6440 (55.8%) | 6435 (55.7%) | 6344 (55.0%) |
| Male                                                    | 5051 (43.7%)          | 5118 (44.3%) | 5105 (44.2%) | 5110 (44.3%) | 5201 (45.0%) |
| <b>Average total household income before tax (£)</b>    |                       |              |              |              |              |
| Less than 18,000                                        | 1280 (11.1%)          | 1687 (14.6%) | 1900 (16.5%) | 1942 (16.8%) | 2116 (18.3%) |
| 18,000 to 30,999                                        | 2039 (17.7%)          | 2127 (18.4%) | 2087 (18.1%) | 1979 (17.1%) | 1874 (16.2%) |
| 31,000 to 51,999                                        | 2633 (22.8%)          | 2500 (21.7%) | 2441 (21.1%) | 2340 (20.3%) | 2019 (17.5%) |
| 52,000 to 100,000                                       | 2734 (23.7%)          | 2501 (21.7%) | 2315 (20.1%) | 2249 (19.5%) | 2245 (19.4%) |
| Greater than 100,000                                    | 1017 (8.8%)           | 898 (7.8%)   | 1059 (9.2%)  | 1232 (10.7%) | 1588 (13.8%) |
| Missing                                                 | 1843 (16.0%)          | 1832 (15.9%) | 1743 (15.1%) | 1803 (15.6%) | 1703 (14.8%) |
| <b>Index of Multiple Deprivation (small-area level)</b> |                       |              |              |              |              |
| Medium deprivation                                      | 3482 (30.2%)          | 4864 (42.1%) | 6124 (53.0%) | 5814 (50.4%) | 4907 (42.5%) |

|                                                                    |              |              |              |              |              |
|--------------------------------------------------------------------|--------------|--------------|--------------|--------------|--------------|
| Low deprivation                                                    | 7350 (63.7%) | 5097 (44.1%) | 3193 (27.7%) | 2193 (19.0%) | 406 (3.5%)   |
| High deprivation                                                   | 714 (6.2%)   | 1584 (13.7%) | 2228 (19.3%) | 3538 (30.6%) | 6232 (54.0%) |
| <b>IPAQ activity group</b>                                         |              |              |              |              |              |
| Low                                                                | 1739 (15.1%) | 1640 (14.2%) | 1606 (13.9%) | 1619 (14.0%) | 1451 (12.6%) |
| Moderate                                                           | 4132 (35.8%) | 4080 (35.3%) | 4151 (36.0%) | 4263 (36.9%) | 4385 (38.0%) |
| High                                                               | 3714 (32.2%) | 3813 (33.0%) | 3762 (32.6%) | 3786 (32.8%) | 3859 (33.4%) |
| Missing                                                            | 1961 (17.0%) | 2012 (17.4%) | 2026 (17.5%) | 1877 (16.3%) | 1850 (16.0%) |
| <b>Achieved UK physical activity recommendations via MVPA only</b> |              |              |              |              |              |
| Yes                                                                | 7865 (68.1%) | 7898 (68.4%) | 7939 (68.8%) | 8103 (70.2%) | 8245 (71.4%) |
| No                                                                 | 1717 (14.9%) | 1633 (14.1%) | 1576 (13.7%) | 1563 (13.5%) | 1447 (12.5%) |
| Missing                                                            | 1964 (17.0%) | 2014 (17.4%) | 2030 (17.6%) | 1879 (16.3%) | 1853 (16.1%) |
| <b>Achieved UK physical activity recommendations via MVPA only</b> |              |              |              |              |              |
| Yes                                                                | 5196 (45.0%) | 5206 (45.1%) | 5163 (44.7%) | 5169 (44.8%) | 5241 (45.4%) |
| No                                                                 | 4389 (38.0%) | 4327 (37.5%) | 4356 (37.7%) | 4499 (39.0%) | 4454 (38.6%) |
| Missing                                                            | 1961 (17.0%) | 2012 (17.4%) | 2026 (17.5%) | 1877 (16.3%) | 1850 (16.0%) |
| <b>Non-commuting transport</b>                                     |              |              |              |              |              |
| Car/motor vehicle                                                  | 6893 (59.7%) | 5809 (50.3%) | 5041 (43.7%) | 4351 (37.7%) | 2990 (25.9%) |
| Cycle                                                              | 116 (1.0%)   | 162 (1.4%)   | 193 (1.7%)   | 198 (1.7%)   | 348 (3.0%)   |
| Walk                                                               | 1251 (10.8%) | 1874 (16.2%) | 2349 (20.3%) | 2860 (24.8%) | 3597 (31.2%) |
| Public transport                                                   | 760 (6.6%)   | 1116 (9.7%)  | 1380 (12.0%) | 1680 (14.6%) | 2030 (17.6%) |
| Missing                                                            | 2526 (21.9%) | 2584 (22.4%) | 2582 (22.4%) | 2456 (21.4%) | 2580 (22.4%) |
| <b>Commuting transport</b>                                         |              |              |              |              |              |
| Car/motor vehicle                                                  | 3049 (26.4%) | 2837 (24.6%) | 2542 (22.0%) | 1994 (17.3%) | 1300 (11.3%) |
| Cycle                                                              | 104 (0.9%)   | 174 (1.5%)   | 188 (1.6%)   | 233 (2.0%)   | 395 (3.4%)   |
| Walk                                                               | 563 (4.9%)   | 700 (6.1%)   | 850 (7.4%)   | 1083 (9.4%)  | 1552 (13.4%) |
| Public transport                                                   | 871 (7.5%)   | 1137 (9.8%)  | 1420 (12.3%) | 1788 (15.5%) | 1903 (16.5%) |
| Missing                                                            | 6959 (60.3%) | 6697 (58%)   | 6545 (56.7%) | 6447 (55.5%) | 6395 (55.4%) |

**Table S3:** Baseline characteristics of UK Biobank participants (n = 57,726) by quintiles of *green walkability*; all study participants resided within Greater London administrative boundaries at study baseline (2006-2010).

|                                                                    | <b>Green walkability quintiles</b> |                         |                         |                         |                         |
|--------------------------------------------------------------------|------------------------------------|-------------------------|-------------------------|-------------------------|-------------------------|
|                                                                    | <b>Q1<br/>(N=11546)</b>            | <b>Q2<br/>(N=11545)</b> | <b>Q3<br/>(N=11545)</b> | <b>Q4<br/>(N=11545)</b> | <b>Q5<br/>(N=11545)</b> |
| <b>Age at baseline (years)</b>                                     |                                    |                         |                         |                         |                         |
| Mean (SD)                                                          | 57.2 (7.95)                        | 56.1 (8.26)             | 55.8 (8.31)             | 55.6 (8.26)             | 55.2 (8.25)             |
| <b>Sex</b>                                                         |                                    |                         |                         |                         |                         |
| Female                                                             | 6472 (56.1%)                       | 6385 (55.3%)            | 6514 (56.4%)            | 6407 (55.5%)            | 6363 (55.1%)            |
| Male                                                               | 5074 (43.9%)                       | 5160 (44.7%)            | 5031 (43.6%)            | 5138 (44.5%)            | 5182 (44.9%)            |
| <b>Average total household income before tax (£)</b>               |                                    |                         |                         |                         |                         |
| Less than 18,000                                                   | 1415 (12.3%)                       | 1778 (15.4%)            | 1880 (16.3%)            | 1861 (16.1%)            | 1991 (17.2%)            |
| 18,000 to 30,999                                                   | 2126 (18.4%)                       | 2082 (18.0%)            | 2129 (18.4%)            | 1915 (16.6%)            | 1854 (16.1%)            |
| 31,000 to 51,999                                                   | 2602 (22.5%)                       | 2475 (21.4%)            | 2408 (20.9%)            | 2386 (20.7%)            | 2062 (17.9%)            |
| 52,000 to 100,000                                                  | 2631 (22.8%)                       | 2473 (21.4%)            | 2237 (19.4%)            | 2355 (20.4%)            | 2348 (20.3%)            |
| Greater than 100,000                                               | 842 (7.3%)                         | 875 (7.6%)              | 1130 (9.8%)             | 1321 (11.4%)            | 1626 (14.1%)            |
| Missing                                                            | 1930 (16.7%)                       | 1862 (16.1%)            | 1761 (15.3%)            | 1707 (14.8%)            | 1664 (14.4%)            |
| <b>Index of Multiple Deprivation (small-area level)</b>            |                                    |                         |                         |                         |                         |
| Medium deprivation                                                 | 3845 (33.3%)                       | 5358 (46.4%)            | 5590 (48.4%)            | 5374 (46.5%)            | 5024 (43.5%)            |
| Low deprivation                                                    | 6659 (57.7%)                       | 4220 (36.6%)            | 3505 (30.4%)            | 3030 (26.2%)            | 825 (7.1%)              |
| High deprivation                                                   | 1042 (9.0%)                        | 1967 (17.0%)            | 2450 (21.2%)            | 3141 (27.2%)            | 5696 (49.3%)            |
| <b>IPAQ activity group</b>                                         |                                    |                         |                         |                         |                         |
| Low                                                                | 1703 (14.7%)                       | 1636 (14.2%)            | 1639 (14.2%)            | 1609 (13.9%)            | 1468 (12.7%)            |
| Moderate                                                           | 4090 (35.4%)                       | 4152 (36.0%)            | 4135 (35.8%)            | 4173 (36.1%)            | 4461 (38.6%)            |
| High                                                               | 3705 (32.1%)                       | 3686 (31.9%)            | 3822 (33.1%)            | 3899 (33.8%)            | 3822 (33.1%)            |
| Missing                                                            | 2048 (17.7%)                       | 2071 (17.9%)            | 1949 (16.9%)            | 1864 (16.1%)            | 1794 (15.5%)            |
| <b>Achieved UK physical activity recommendations via MVPA only</b> |                                    |                         |                         |                         |                         |
| Yes                                                                | 7827 (67.8%)                       | 7845 (68.0%)            | 7972 (69.1%)            | 8110 (70.2%)            | 8296 (71.9%)            |
| No                                                                 | 1667 (14.4%)                       | 1627 (14.1%)            | 1622 (14.0%)            | 1567 (13.6%)            | 1453 (12.6%)            |
| Missing                                                            | 2052 (17.8%)                       | 2073 (18.0%)            | 1951 (16.9%)            | 1868 (16.2%)            | 1796 (15.6%)            |
| <b>Achieved UK physical activity recommendations via MVPA only</b> |                                    |                         |                         |                         |                         |
| Yes                                                                | 5147 (44.6%)                       | 5094 (44.1%)            | 5202 (45.1%)            | 5254 (45.5%)            | 5278 (45.7%)            |
| No                                                                 | 4351 (37.7%)                       | 4380 (37.9%)            | 4394 (38.1%)            | 4427 (38.3%)            | 4473 (38.7%)            |
| Missing                                                            | 2048 (17.7%)                       | 2071 (17.9%)            | 1949 (16.9%)            | 1864 (16.1%)            | 1794 (15.5%)            |

|                                |              |              |              |              |              |
|--------------------------------|--------------|--------------|--------------|--------------|--------------|
| <b>Non-commuting transport</b> |              |              |              |              |              |
| Car/motor vehicle              | 6724 (58.2%) | 5637 (48.8%) | 5006 (43.4%) | 4422 (38.3%) | 3295 (28.5%) |
| Cycle                          | 90 (0.8%)    | 179 (1.6%)   | 187 (1.6%)   | 223 (1.9%)   | 338 (2.9%)   |
| Walk                           | 1388 (12.0%) | 1900 (16.5%) | 2380 (20.6%) | 2826 (24.5%) | 3437 (29.8%) |
| Public transport               | 819 (7.1%)   | 1184 (10.3%) | 1464 (12.7%) | 1556 (13.5%) | 1943 (16.8%) |
| Missing                        | 2525 (21.9%) | 2645 (22.9%) | 2508 (21.7%) | 2518 (21.8%) | 2532 (22%)   |
| <b>Commuting transport</b>     |              |              |              |              |              |
| Car/motor vehicle              | 3021 (26.2%) | 2799 (24.2%) | 2416 (20.9%) | 2013 (17.4%) | 1473 (12.8%) |
| Cycle                          | 103 (0.9%)   | 168 (1.5%)   | 192 (1.7%)   | 248 (2.1%)   | 383 (3.3%)   |
| Walk                           | 602 (5.2%)   | 711 (6.2%)   | 900 (7.8%)   | 1084 (9.4%)  | 1451 (12.6%) |
| Public transport               | 954 (8.3%)   | 1204 (10.4%) | 1490 (12.9%) | 1600 (13.9%) | 1871 (16.2%) |
| Missing                        | 6886 (59.5%) | 6663 (57.8%) | 6547 (56.7%) | 6600 (57.2%) | 6367 (55.2%) |

**Table S4:** Baseline characteristics of UK Biobank participants (n = 57,726) by quintiles of *ground-cover walkability*; all study participants resided within Greater London administrative boundaries at study baseline (2006-2010).

|                                                                    | <b>Ground-cover walkability quintiles</b> |                  |                  |                  |                  |
|--------------------------------------------------------------------|-------------------------------------------|------------------|------------------|------------------|------------------|
|                                                                    | <b>Q1</b>                                 | <b>Q2</b>        | <b>Q3</b>        | <b>Q4</b>        | <b>Q5</b>        |
|                                                                    | <b>(N=11546)</b>                          | <b>(N=11545)</b> | <b>(N=11545)</b> | <b>(N=11545)</b> | <b>(N=11545)</b> |
| <b>Age at baseline (years)</b>                                     |                                           |                  |                  |                  |                  |
| Mean (SD)                                                          | 57.6 (7.82)                               | 56.0 (8.23)      | 55.8 (8.31)      | 55.4 (8.33)      | 55.1 (8.25)      |
| <b>Sex</b>                                                         |                                           |                  |                  |                  |                  |
| Female                                                             | 6519 (56.5%)                              | 6431 (55.7%)     | 6403 (55.5%)     | 6408 (55.5%)     | 6380 (55.3%)     |
| Male                                                               | 5027 (43.5%)                              | 5114 (44.3%)     | 5142 (44.5%)     | 5137 (44.5%)     | 5165 (44.7%)     |
| <b>Average total household income before tax (£)</b>               |                                           |                  |                  |                  |                  |
| Less than 18,000                                                   | 1214 (10.5%)                              | 1727 (15.0%)     | 1924 (16.7%)     | 2033 (17.6%)     | 2027 (17.6%)     |
| 18,000 to 30,999                                                   | 1986 (17.2%)                              | 2044 (17.7%)     | 2171 (18.8%)     | 2072 (17.9%)     | 1833 (15.9%)     |
| 31,000 to 51,999                                                   | 2563 (22.2%)                              | 2495 (21.6%)     | 2454 (21.3%)     | 2327 (20.2%)     | 2094 (18.1%)     |
| 52,000 to 100,000                                                  | 2845 (24.6%)                              | 2527 (21.9%)     | 2207 (19.1%)     | 2114 (18.3%)     | 2351 (20.4%)     |
| Greater than 100,000                                               | 1132 (9.8%)                               | 1045 (9.1%)      | 943 (8.2%)       | 1143 (9.9%)      | 1531 (13.3%)     |
| Missing                                                            | 1806 (15.6%)                              | 1707 (14.8%)     | 1846 (16.0%)     | 1856 (16.1%)     | 1709 (14.8%)     |
| <b>Index of Multiple Deprivation (small-area level)</b>            |                                           |                  |                  |                  |                  |
| Medium deprivation                                                 | 3512 (30.4%)                              | 5201 (45.0%)     | 5719 (49.5%)     | 5815 (50.4%)     | 4944 (42.8%)     |
| Low deprivation                                                    | 7379 (63.9%)                              | 4512 (39.1%)     | 3213 (27.8%)     | 2082 (18.0%)     | 1053 (9.1%)      |
| High deprivation                                                   | 655 (5.7%)                                | 1832 (15.9%)     | 2613 (22.6%)     | 3648 (31.6%)     | 5548 (48.1%)     |
| <b>IPAQ activity group</b>                                         |                                           |                  |                  |                  |                  |
| Low                                                                | 1667 (14.4%)                              | 1655 (14.3%)     | 1602 (13.9%)     | 1661 (14.4%)     | 1470 (12.7%)     |
| Moderate                                                           | 4201 (36.4%)                              | 4192 (36.3%)     | 4138 (35.8%)     | 4088 (35.4%)     | 4392 (38.0%)     |
| High                                                               | 3802 (32.9%)                              | 3779 (32.7%)     | 3725 (32.3%)     | 3791 (32.8%)     | 3837 (33.2%)     |
| Missing                                                            | 1876 (16.2%)                              | 1919 (16.6%)     | 2080 (18.0%)     | 2005 (17.4%)     | 1846 (16.0%)     |
| <b>Achieved UK physical activity recommendations via MVPA only</b> |                                           |                  |                  |                  |                  |
| Yes                                                                | 8022 (69.5%)                              | 7972 (69.1%)     | 7881 (68.3%)     | 7941 (68.8%)     | 8234 (71.3%)     |
| No                                                                 | 1645 (14.2%)                              | 1651 (14.3%)     | 1581 (13.7%)     | 1596 (13.8%)     | 1463 (12.7%)     |
| Missing                                                            | 1879 (16.3%)                              | 1922 (16.6%)     | 2083 (18.0%)     | 2008 (17.4%)     | 1848 (16.0%)     |
| <b>Achieved UK physical activity recommendations via MVPA only</b> |                                           |                  |                  |                  |                  |
| Yes                                                                | 5279 (45.7%)                              | 5197 (45.0%)     | 5112 (44.3%)     | 5138 (44.5%)     | 5249 (45.5%)     |
| No                                                                 | 4391 (38.0%)                              | 4429 (38.4%)     | 4353 (37.7%)     | 4402 (38.1%)     | 4450 (38.5%)     |
| Missing                                                            | 1876 (16.2%)                              | 1919 (16.6%)     | 2080 (18.0%)     | 2005 (17.4%)     | 1846 (16.0%)     |
| <b>Non-commuting transport</b>                                     |                                           |                  |                  |                  |                  |
| Car/motor vehicle                                                  | 6659 (57.7%)                              | 5546 (48.0%)     | 5012 (43.4%)     | 4465 (38.7%)     | 3402 (29.5%)     |
| Cycle                                                              | 102 (0.9%)                                | 199 (1.7%)       | 188 (1.6%)       | 211 (1.8%)       | 317 (2.7%)       |
| Walk                                                               | 1466 (12.7%)                              | 2009 (17.4%)     | 2337 (20.2%)     | 2721 (23.6%)     | 3398 (29.4%)     |
| Public transport                                                   | 840 (7.3%)                                | 1125 (9.7%)      | 1442 (12.5%)     | 1659 (14.4%)     | 1900 (16.5%)     |
| Missing                                                            | 2479 (21.4%)                              | 2666 (23.1%)     | 2566 (22.2%)     | 2489 (21.6%)     | 2528 (22%)       |
| <b>Commuting transport</b>                                         |                                           |                  |                  |                  |                  |
| Car/motor vehicle                                                  | 2848 (24.7%)                              | 2734 (23.7%)     | 2470 (21.4%)     | 2124 (18.4%)     | 1546 (13.4%)     |
| Cycle                                                              | 101 (0.9%)                                | 197 (1.7%)       | 192 (1.7%)       | 239 (2.1%)       | 365 (3.2%)       |
| Walk                                                               | 633 (5.5%)                                | 772 (6.7%)       | 882 (7.6%)       | 1039 (9.0%)      | 1422 (12.3%)     |
| Public transport                                                   | 969 (8.4%)                                | 1234 (10.7%)     | 1454 (12.6%)     | 1621 (14.0%)     | 1841 (15.9%)     |
| Missing                                                            | 6995 (60.6%)                              | 6608 (57.3%)     | 6547 (56.8%)     | 6522 (56.5%)     | 6371 (55.1%)     |

**Table S5:** Baseline characteristics of UK Biobank participants (n = 57,726) by quintiles of *tree-cover walkability*; all study participants resided within Greater London administrative boundaries at study baseline (2006-2010).

|                                                                    | Tree-cover walkability quintiles |                 |                 |                 |                 |
|--------------------------------------------------------------------|----------------------------------|-----------------|-----------------|-----------------|-----------------|
|                                                                    | Q1<br>(N=11546)                  | Q2<br>(N=11545) | Q3<br>(N=11545) | Q4<br>(N=11545) | Q5<br>(N=11545) |
| <b>Age at baseline (years)</b>                                     |                                  |                 |                 |                 |                 |
| Mean (SD)                                                          | 56.8 (8.16)                      | 56.5 (8.11)     | 56.0 (8.31)     | 55.3 (8.26)     | 55.3 (8.23)     |
| <b>Sex</b>                                                         |                                  |                 |                 |                 |                 |
| Female                                                             | 6378 (55.2%)                     | 6441 (55.8%)    | 6544 (56.7%)    | 6428 (55.7%)    | 6350 (55.0%)    |
| Male                                                               | 5168 (44.8%)                     | 5104 (44.2%)    | 5001 (43.3%)    | 5117 (44.3%)    | 5195 (45.0%)    |
| <b>Average total household income before tax (£)</b>               |                                  |                 |                 |                 |                 |
| Less than 18,000                                                   | 1717 (14.9%)                     | 1725 (14.9%)    | 1638 (14.2%)    | 1836 (15.9%)    | 2009 (17.4%)    |
| 18,000 to 30,999                                                   | 2204 (19.1%)                     | 2154 (18.7%)    | 1979 (17.1%)    | 1950 (16.9%)    | 1819 (15.8%)    |
| 31,000 to 51,999                                                   | 2591 (22.4%)                     | 2520 (21.8%)    | 2474 (21.4%)    | 2279 (19.7%)    | 2069 (17.9%)    |
| 52,000 to 100,000                                                  | 2364 (20.5%)                     | 2423 (21.0%)    | 2489 (21.6%)    | 2457 (21.3%)    | 2311 (20.0%)    |
| Greater than 100,000                                               | 641 (5.6%)                       | 788 (6.8%)      | 1299 (11.3%)    | 1393 (12.1%)    | 1673 (14.5%)    |
| Missing                                                            | 2029 (17.6%)                     | 1935 (16.8%)    | 1666 (14.4%)    | 1630 (14.1%)    | 1664 (14.4%)    |
| <b>Index of Multiple Deprivation (small-area level)</b>            |                                  |                 |                 |                 |                 |
| Medium deprivation                                                 | 4278 (37.1%)                     | 5029 (43.6%)    | 5584 (48.4%)    | 5111 (44.3%)    | 5189 (44.9%)    |
| Low deprivation                                                    | 5633 (48.8%)                     | 4796 (41.5%)    | 4012 (34.8%)    | 3270 (28.3%)    | 528 (4.6%)      |
| High deprivation                                                   | 1635 (14.2%)                     | 1720 (14.9%)    | 1949 (16.9%)    | 3164 (27.4%)    | 5828 (50.5%)    |
| <b>IPAQ activity group</b>                                         |                                  |                 |                 |                 |                 |
| Low                                                                | 1719 (14.9%)                     | 1692 (14.7%)    | 1598 (13.8%)    | 1604 (13.9%)    | 1442 (12.5%)    |
| Moderate                                                           | 3964 (34.3%)                     | 4065 (35.2%)    | 4228 (36.6%)    | 4322 (37.4%)    | 4432 (38.4%)    |
| High                                                               | 3640 (31.5%)                     | 3700 (32.0%)    | 3889 (33.7%)    | 3843 (33.3%)    | 3862 (33.5%)    |
| Missing                                                            | 2223 (19.3%)                     | 2088 (18.1%)    | 1830 (15.9%)    | 1776 (15.4%)    | 1809 (15.7%)    |
| <b>Achieved UK physical activity recommendations via MVPA only</b> |                                  |                 |                 |                 |                 |
| Yes                                                                | 7614 (65.9%)                     | 7813 (67.7%)    | 8116 (70.3%)    | 8194 (71.0%)    | 8313 (72.0%)    |
| No                                                                 | 1706 (14.8%)                     | 1641 (14.2%)    | 1599 (13.9%)    | 1569 (13.6%)    | 1421 (12.3%)    |
| Missing                                                            | 2226 (19.3%)                     | 2091 (18.1%)    | 1830 (15.9%)    | 1782 (15.4%)    | 1811 (15.7%)    |
| <b>Achieved UK physical activity recommendations via MVPA only</b> |                                  |                 |                 |                 |                 |
| Yes                                                                | 5045 (43.7%)                     | 5076 (44.0%)    | 5329 (46.2%)    | 5240 (45.4%)    | 5285 (45.8%)    |
| No                                                                 | 4278 (37.1%)                     | 4381 (37.9%)    | 4386 (38.0%)    | 4529 (39.2%)    | 4451 (38.6%)    |
| Missing                                                            | 2223 (19.3%)                     | 2088 (18.1%)    | 1830 (15.9%)    | 1776 (15.4%)    | 1809 (15.7%)    |
| <b>Non-commuting transport</b>                                     |                                  |                 |                 |                 |                 |
| Car/motor vehicle                                                  | 6530 (56.6%)                     | 5939 (51.4%)    | 5196 (45.0%)    | 4267 (37.0%)    | 3152 (27.3%)    |
| Cycle                                                              | 120 (1.0%)                       | 127 (1.1%)      | 203 (1.8%)      | 232 (2.0%)      | 335 (2.9%)      |
| Walk                                                               | 1400 (12.1%)                     | 1833 (15.9%)    | 2269 (19.7%)    | 2897 (25.1%)    | 3532 (30.6%)    |
| Public transport                                                   | 936 (8.1%)                       | 1098 (9.5%)     | 1336 (11.6%)    | 1626 (14.1%)    | 1970 (17.1%)    |
| Missing                                                            | 2596 (22.2%)                     | 2548 (22%)      | 2541 (22.1%)    | 2523 (21.8%)    | 2556 (22.2%)    |
| <b>Commuting transport</b>                                         |                                  |                 |                 |                 |                 |
| Car/motor vehicle                                                  | 3194 (27.7%)                     | 2864 (24.8%)    | 2404 (20.8%)    | 1909 (16.5%)    | 1351 (11.7%)    |
| Cycle                                                              | 106 (0.9%)                       | 148 (1.3%)      | 196 (1.7%)      | 263 (2.3%)      | 381 (3.3%)      |
| Walk                                                               | 553 (4.8%)                       | 722 (6.3%)      | 820 (7.1%)      | 1141 (9.9%)     | 1512 (13.1%)    |
| Public transport                                                   | 951 (8.2%)                       | 1119 (9.7%)     | 1454 (12.6%)    | 1730 (15.0%)    | 1865 (16.2%)    |
| Missing                                                            | 6742 (58.4%)                     | 6692 (57.9%)    | 6671 (57.9%)    | 6502 (56.4%)    | 6436 (55.8%)    |

**Table S6:** Baseline characteristics of UK Biobank participants with 7-day accelerometer information (n = 12,986) by quintiles of *walkability*; all study participants resided within Greater London administrative boundaries at study baseline (2006-2010).

|                                                      | Walkability Quintiles |                |                |                |                |
|------------------------------------------------------|-----------------------|----------------|----------------|----------------|----------------|
|                                                      | Q1<br>(N=2598)        | Q2<br>(N=2597) | Q3<br>(N=2597) | Q4<br>(N=2597) | Q5<br>(N=2597) |
| <b>Age at baseline (years)</b>                       |                       |                |                |                |                |
| Mean (SD)                                            | 57.6 (7.59)           | 56.6 (8.04)    | 56.1 (7.82)    | 55.2 (8.26)    | 54.9 (8.01)    |
| <b>Sex</b>                                           |                       |                |                |                |                |
| Female                                               | 1513 (58.2%)          | 1512 (58.2%)   | 1488 (57.3%)   | 1571 (60.5%)   | 1588 (61.1%)   |
| Male                                                 | 1085 (41.8%)          | 1085 (41.8%)   | 1109 (42.7%)   | 1026 (39.5%)   | 1009 (38.9%)   |
| <b>Average total household income before tax (£)</b> |                       |                |                |                |                |
| Less than 18,000                                     | 197 (7.6%)            | 269 (10.4%)    | 283 (10.9%)    | 276 (10.6%)    | 284 (10.9%)    |
| 18,000 to 30,999                                     | 423 (16.3%)           | 479 (18.4%)    | 434 (16.7%)    | 420 (16.2%)    | 406 (15.6%)    |



|                                                                                                                          |              |              |              |              |              |
|--------------------------------------------------------------------------------------------------------------------------|--------------|--------------|--------------|--------------|--------------|
| <b>31,000 to 51,999</b>                                                                                                  | 633 (24.4%)  | 627 (24.1%)  | 623 (24.0%)  | 629 (24.2%)  | 542 (20.9%)  |
| <b>52,000 to 100,000</b>                                                                                                 | 736 (28.3%)  | 697 (26.8%)  | 676 (26.0%)  | 690 (26.6%)  | 681 (26.2%)  |
| <b>Greater than 100,000</b>                                                                                              | 309 (11.9%)  | 257 (9.9%)   | 324 (12.5%)  | 370 (14.2%)  | 488 (18.8%)  |
| <b>Missing</b>                                                                                                           | 300 (11.5%)  | 268 (10.3%)  | 257 (9.9%)   | 212 (8.2%)   | 196 (7.5%)   |
| <b>Index of Multiple Deprivation (small-area level)</b>                                                                  |              |              |              |              |              |
| <b>Low deprivation</b>                                                                                                   | 1788 (68.8%) | 1318 (50.8%) | 919 (35.4%)  | 670 (25.8%)  | 128 (4.9%)   |
| <b>Medium deprivation</b>                                                                                                | 717 (27.6%)  | 1043 (40.2%) | 1326 (51.1%) | 1378 (53.1%) | 1276 (49.1%) |
| <b>High deprivation</b>                                                                                                  | 93 (3.6%)    | 236 (9.1%)   | 352 (13.6%)  | 549 (21.1%)  | 1193 (45.9%) |
| <b>IPAQ activity group</b>                                                                                               |              |              |              |              |              |
| <b>Low</b>                                                                                                               | 383 (14.7%)  | 343 (13.2%)  | 337 (13.0%)  | 346 (13.3%)  | 304 (11.7%)  |
| <b>Moderate</b>                                                                                                          | 979 (37.7%)  | 984 (37.9%)  | 1005 (38.7%) | 1012 (39.0%) | 1061 (40.9%) |
| <b>High</b>                                                                                                              | 891 (34.3%)  | 903 (34.8%)  | 927 (35.7%)  | 922 (35.5%)  | 951 (36.6%)  |
| <b>Missing</b>                                                                                                           | 345 (13.3%)  | 367 (14.1%)  | 328 (12.6%)  | 317 (12.2%)  | 281 (10.8%)  |
| <b>Achieved UK physical activity recommendations via MVPA and walking</b>                                                |              |              |              |              |              |
| <b>Yes</b>                                                                                                               | 1879 (72.3%) | 1878 (72.3%) | 1933 (74.4%) | 1945 (74.9%) | 2017 (77.7%) |
| <b>No</b>                                                                                                                | 374 (14.4%)  | 352 (13.6%)  | 336 (12.9%)  | 335 (12.9%)  | 299 (11.5%)  |
| <b>Missing</b>                                                                                                           | 345 (13.3%)  | 367 (14.1%)  | 328 (12.6%)  | 317 (12.2%)  | 281 (10.8%)  |
| <b>Achieved UK physical activity recommendations via MVPA only</b>                                                       |              |              |              |              |              |
| <b>Yes</b>                                                                                                               | 1253 (48.2%) | 1235 (47.6%) | 1246 (48.0%) | 1260 (48.5%) | 1300 (50.1%) |
| <b>No</b>                                                                                                                | 1000 (38.5%) | 995 (38.3%)  | 1023 (39.4%) | 1020 (39.3%) | 1016 (39.1%) |
| <b>Missing</b>                                                                                                           | 345 (13.3%)  | 367 (14.1%)  | 328 (12.6%)  | 317 (12.2%)  | 281 (10.8%)  |
| <b>7-day accelerometer: minutes spent doing MVPA (<math>\geq 125</math> mg)</b>                                          |              |              |              |              |              |
| <b>Mean (SD)</b>                                                                                                         | 73.5 (35.1)  | 74.9 (37.0)  | 75.3 (35.9)  | 77.4 (36.2)  | 78.1 (35.9)  |
| <b>7-day accelerometer: minutes spent doing moderate activity (<math>\geq 125</math> mg and <math>&lt;425</math> mg)</b> |              |              |              |              |              |
| <b>Mean (SD)</b>                                                                                                         | 69.6 (32.4)  | 71.0 (34.0)  | 71.4 (33.4)  | 73.3 (33.5)  | 74.2 (33.4)  |
| <b>7-day accelerometer: minutes spent doing vigorous activity (<math>\geq 425</math> mg)</b>                             |              |              |              |              |              |
| <b>Mean (SD)</b>                                                                                                         | 3.88 (5.32)  | 3.92 (5.82)  | 3.88 (5.54)  | 4.13 (5.83)  | 3.83 (5.57)  |
| <b>Non-commuting transport</b>                                                                                           |              |              |              |              |              |
| <b>Car/motor vehicle</b>                                                                                                 | 1601 (61.6%) | 1325 (51.0%) | 1137 (43.8%) | 1000 (38.5%) | 701 (27.0%)  |
| <b>Cycle</b>                                                                                                             | 35 (1.3%)    | 48 (1.8%)    | 49 (1.9%)    | 60 (2.3%)    | 104 (4.0%)   |
| <b>Walk</b>                                                                                                              | 264 (10.2%)  | 450 (17.3%)  | 587 (22.6%)  | 721 (27.8%)  | 907 (34.9%)  |
| <b>Public transport</b>                                                                                                  | 155 (6.0%)   | 220 (8.5%)   | 217 (8.4%)   | 274 (10.6%)  | 294 (11.3%)  |
| <b>Missing</b>                                                                                                           | 543 (20.9%)  | 554 (21.3%)  | 607 (23.3%)  | 542 (20.8%)  | 591 (22.8%)  |
| <b>Commuting transport</b>                                                                                               |              |              |              |              |              |
| <b>Car/motor vehicle</b>                                                                                                 | 677 (26.1%)  | 630 (24.3%)  | 550 (21.2%)  | 409 (15.7%)  | 310 (11.9%)  |
| <b>Cycle</b>                                                                                                             | 31 (1.2%)    | 47 (1.8%)    | 43 (1.7%)    | 79 (3.0%)    | 126 (4.9%)   |
| <b>Walk</b>                                                                                                              | 155 (6.0%)   | 197 (7.6%)   | 246 (9.5%)   | 304 (11.7%)  | 438 (16.9%)  |
| <b>Public transport</b>                                                                                                  | 190 (7.3%)   | 278 (10.7%)  | 299 (11.5%)  | 393 (15.1%)  | 410 (15.8%)  |
| <b>Missing</b>                                                                                                           | 1545 (59.4%) | 1445 (55.7%) | 1459 (56.1%) | 1412 (54.3%) | 1313 (50.5%) |

**Table S7:** Baseline characteristics of UK Biobank participants with 7-day accelerometer information (n = 12,986) by quintiles of *green walkability*; all study participants resided within Greater London administrative boundaries at study baseline (2006-2010).

|                                                      | <b>Green walkability quintiles</b> |                 |                 |                 |                 |
|------------------------------------------------------|------------------------------------|-----------------|-----------------|-----------------|-----------------|
|                                                      | <b>Q1</b>                          | <b>Q2</b>       | <b>Q3</b>       | <b>Q4</b>       | <b>Q5</b>       |
|                                                      | <b>(N=2598)</b>                    | <b>(N=2597)</b> | <b>(N=2597)</b> | <b>(N=2597)</b> | <b>(N=2597)</b> |
| <b>Age at baseline (years)</b>                       |                                    |                 |                 |                 |                 |
| <b>Mean (SD)</b>                                     | 57.2 (7.64)                        | 56.3 (8.05)     | 56.1 (8.09)     | 55.6 (8.04)     | 55.1 (8.05)     |
| <b>Sex</b>                                           |                                    |                 |                 |                 |                 |
| <b>Female</b>                                        | 1531 (58.9%)                       | 1471 (56.6%)    | 1533 (59.0%)    | 1539 (59.3%)    | 1598 (61.5%)    |
| <b>Male</b>                                          | 1067 (41.1%)                       | 1126 (43.4%)    | 1064 (41.0%)    | 1058 (40.7%)    | 999 (38.5%)     |
| <b>Average total household income before tax (£)</b> |                                    |                 |                 |                 |                 |
| <b>Less than 18,000</b>                              | 218 (8.4%)                         | 259 (10.0%)     | 284 (10.9%)     | 276 (10.6%)     | 272 (10.5%)     |
| <b>18,000 to 30,999</b>                              | 464 (17.9%)                        | 468 (18.0%)     | 457 (17.6%)     | 373 (14.4%)     | 400 (15.4%)     |
| <b>31,000 to 51,999</b>                              | 633 (24.4%)                        | 637 (24.5%)     | 591 (22.8%)     | 651 (25.1%)     | 542 (20.9%)     |
| <b>52,000 to 100,000</b>                             | 724 (27.9%)                        | 696 (26.8%)     | 644 (24.8%)     | 715 (27.5%)     | 701 (27.0%)     |
| <b>Greater than 100,000</b>                          | 257 (9.9%)                         | 282 (10.9%)     | 354 (13.6%)     | 366 (14.1%)     | 489 (18.8%)     |
| <b>Missing</b>                                       | 302 (11.6%)                        | 255 (9.8%)      | 267 (10.3%)     | 216 (8.3%)      | 193 (7.4%)      |

| Index of Multiple Deprivation (small-area level)                                          |              |              |              |              |              |
|-------------------------------------------------------------------------------------------|--------------|--------------|--------------|--------------|--------------|
| Low deprivation                                                                           | 1639 (63.1%) | 1126 (43.4%) | 953 (36.7%)  | 861 (33.2%)  | 244 (9.4%)   |
| Medium deprivation                                                                        | 800 (30.8%)  | 1148 (44.2%) | 1259 (48.5%) | 1251 (48.2%) | 1282 (49.4%) |
| High deprivation                                                                          | 159 (6.1%)   | 323 (12.4%)  | 385 (14.8%)  | 485 (18.7%)  | 1071 (41.2%) |
| IPAQ activity group                                                                       |              |              |              |              |              |
| Low                                                                                       | 364 (14.0%)  | 372 (14.3%)  | 336 (12.9%)  | 337 (13.0%)  | 304 (11.7%)  |
| Moderate                                                                                  | 980 (37.7%)  | 997 (38.4%)  | 1012 (39.0%) | 973 (37.5%)  | 1079 (41.5%) |
| High                                                                                      | 886 (34.1%)  | 889 (34.2%)  | 926 (35.7%)  | 976 (37.6%)  | 917 (35.3%)  |
| Missing                                                                                   | 368 (14.2%)  | 339 (13.1%)  | 323 (12.4%)  | 311 (12.0%)  | 297 (11.4%)  |
| Achieved UK physical activity recommendations via MVPA and walking                        |              |              |              |              |              |
| Yes                                                                                       | 1873 (72.1%) | 1883 (72.5%) | 1945 (74.9%) | 1950 (75.1%) | 2001 (77.1%) |
| No                                                                                        | 357 (13.7%)  | 375 (14.4%)  | 329 (12.7%)  | 336 (12.9%)  | 299 (11.5%)  |
| Missing                                                                                   | 368 (14.2%)  | 339 (13.1%)  | 323 (12.4%)  | 311 (12.0%)  | 297 (11.4%)  |
| Achieved UK physical activity recommendations via MVPA only                               |              |              |              |              |              |
| Yes                                                                                       | 1230 (47.3%) | 1235 (47.6%) | 1242 (47.8%) | 1290 (49.7%) | 1297 (49.9%) |
| No                                                                                        | 1000 (38.5%) | 1023 (39.4%) | 1032 (39.7%) | 996 (38.4%)  | 1003 (38.6%) |
| Missing                                                                                   | 368 (14.2%)  | 339 (13.1%)  | 323 (12.4%)  | 311 (12.0%)  | 297 (11.4%)  |
| 7-day accelerometer: minutes spent doing MVPA ( $\geq 125$ mg)                            |              |              |              |              |              |
| Mean (SD)                                                                                 | 73.2 (35.1)  | 75.1 (37.0)  | 75.6 (35.6)  | 77.7 (37.0)  | 77.6 (35.4)  |
| 7-day accelerometer: minutes spent doing moderate activity ( $\geq 125$ mg and $<425$ mg) |              |              |              |              |              |
| Mean (SD)                                                                                 | 69.5 (32.6)  | 71.0 (34.0)  | 71.7 (32.9)  | 73.6 (34.2)  | 73.7 (32.9)  |
| 7-day accelerometer: minutes spent doing vigorous activity ( $\geq 425$ mg)               |              |              |              |              |              |
| Mean (SD)                                                                                 | 3.68 (4.90)  | 4.08 (6.02)  | 3.83 (5.51)  | 4.16 (5.97)  | 3.89 (5.61)  |
| Non-commuting transport                                                                   |              |              |              |              |              |
| Car/motor vehicle                                                                         | 1535 (59.1%) | 1297 (49.9%) | 1139 (43.9%) | 1014 (39.0%) | 779 (30.0%)  |
| Cycle                                                                                     | 27 (1.0%)    | 48 (1.8%)    | 52 (2.0%)    | 77 (3.0%)    | 92 (3.5%)    |
| Walk                                                                                      | 313 (12.0%)  | 453 (17.4%)  | 595 (22.9%)  | 724 (27.9%)  | 844 (32.5%)  |
| Public transport                                                                          | 166 (6.4%)   | 216 (8.3%)   | 238 (9.2%)   | 239 (9.2%)   | 301 (11.6%)  |
| Missing                                                                                   | 557 (21.4%)  | 583 (22.4%)  | 573 (22.1%)  | 543 (21%)    | 583 (22.3%)  |
| Commuting transport                                                                       |              |              |              |              |              |
| Car/motor vehicle                                                                         | 673 (25.9%)  | 615 (23.7%)  | 520 (20.0%)  | 425 (16.4%)  | 343 (13.2%)  |
| Cycle                                                                                     | 25 (1.0%)    | 51 (2.0%)    | 50 (1.9%)    | 86 (3.3%)    | 114 (4.4%)   |
| Walk                                                                                      | 181 (7.0%)   | 187 (7.2%)   | 259 (10.0%)  | 308 (11.9%)  | 405 (15.6%)  |
| Public transport                                                                          | 217 (8.4%)   | 287 (11.1%)  | 310 (11.9%)  | 349 (13.4%)  | 407 (15.7%)  |
| Missing                                                                                   | 1502 (57.8%) | 1457 (56.3%) | 1458 (56.2%) | 1426 (55.0%) | 1328 (51.1%) |

**Table S8:** Baseline characteristics of UK Biobank participants with 7-day accelerometer information (n = 12,986) by quintiles of *ground-cover walkability*; all study participants resided within Greater London administrative boundaries at study baseline (2006-2010).

|                                                  | Ground-cover walkability quintiles |                |                |                |                |
|--------------------------------------------------|------------------------------------|----------------|----------------|----------------|----------------|
|                                                  | Q1<br>(N=2598)                     | Q2<br>(N=2597) | Q3<br>(N=2597) | Q4<br>(N=2597) | Q5<br>(N=2597) |
| Age at baseline (years)                          |                                    |                |                |                |                |
| Mean (SD)                                        | 57.7 (7.57)                        | 56.2 (7.99)    | 55.9 (8.05)    | 55.6 (8.11)    | 55.0 (8.08)    |
| Sex                                              |                                    |                |                |                |                |
| Female                                           | 1515 (58.3%)                       | 1509 (58.1%)   | 1507 (58.0%)   | 1551 (59.7%)   | 1590 (61.2%)   |
| Male                                             | 1083 (41.7%)                       | 1088 (41.9%)   | 1090 (42.0%)   | 1046 (40.3%)   | 1007 (38.8%)   |
| Average total household income before tax (£)    |                                    |                |                |                |                |
| Less than 18,000                                 | 185 (7.1%)                         | 273 (10.5%)    | 290 (11.2%)    | 292 (11.2%)    | 269 (10.4%)    |
| 18,000 to 30,999                                 | 441 (17.0%)                        | 436 (16.8%)    | 454 (17.5%)    | 438 (16.9%)    | 393 (15.1%)    |
| 31,000 to 51,999                                 | 606 (23.3%)                        | 609 (23.5%)    | 653 (25.1%)    | 629 (24.2%)    | 557 (21.4%)    |
| 52,000 to 100,000                                | 759 (29.2%)                        | 686 (26.4%)    | 661 (25.5%)    | 656 (25.3%)    | 718 (27.6%)    |
| Greater than 100,000                             | 317 (12.2%)                        | 344 (13.2%)    | 295 (11.4%)    | 333 (12.8%)    | 459 (17.7%)    |
| Missing                                          | 290 (11.2%)                        | 249 (9.6%)     | 244 (9.4%)     | 249 (9.6%)     | 201 (7.7%)     |
| Index of Multiple Deprivation (small-area level) |                                    |                |                |                |                |
| Low deprivation                                  | 1766 (68.0%)                       | 1182 (45.5%)   | 942 (36.3%)    | 595 (22.9%)    | 338 (13.0%)    |
| Medium deprivation                               | 748 (28.8%)                        | 1129 (43.5%)   | 1246 (48.0%)   | 1387 (53.4%)   | 1230 (47.4%)   |
| High deprivation                                 | 84 (3.2%)                          | 286 (11.0%)    | 409 (15.7%)    | 615 (23.7%)    | 1029 (39.6%)   |
| IPAQ activity group                              |                                    |                |                |                |                |
| Low                                              | 365 (14.0%)                        | 371 (14.3%)    | 320 (12.3%)    | 355 (13.7%)    | 302 (11.6%)    |
| Moderate                                         | 987 (38.0%)                        | 1012 (39.0%)   | 1012 (39.0%)   | 987 (38.0%)    | 1043 (40.2%)   |
| High                                             | 907 (34.9%)                        | 898 (34.6%)    | 915 (35.2%)    | 925 (35.6%)    | 949 (36.5%)    |
| Missing                                          | 339 (13.0%)                        | 316 (12.2%)    | 350 (13.5%)    | 330 (12.7%)    | 303 (11.7%)    |

|                                                                                                                          |              |              |              |              |              |
|--------------------------------------------------------------------------------------------------------------------------|--------------|--------------|--------------|--------------|--------------|
| <b>Achieved UK physical activity recommendations via MVPA and walking</b>                                                |              |              |              |              |              |
| <b>Yes</b>                                                                                                               | 1897 (73.0%) | 1905 (73.4%) | 1935 (74.5%) | 1927 (74.2%) | 1988 (76.5%) |
| <b>No</b>                                                                                                                | 362 (13.9%)  | 376 (14.5%)  | 312 (12.0%)  | 340 (13.1%)  | 306 (11.8%)  |
| <b>Missing</b>                                                                                                           | 339 (13.0%)  | 316 (12.2%)  | 350 (13.5%)  | 330 (12.7%)  | 303 (11.7%)  |
| <b>Achieved UK physical activity recommendations via MVPA only</b>                                                       |              |              |              |              |              |
| <b>Yes</b>                                                                                                               | 1255 (48.3%) | 1237 (47.6%) | 1258 (48.4%) | 1244 (47.9%) | 1300 (50.1%) |
| <b>No</b>                                                                                                                | 1004 (38.6%) | 1044 (40.2%) | 989 (38.1%)  | 1023 (39.4%) | 994 (38.3%)  |
| <b>Missing</b>                                                                                                           | 339 (13.0%)  | 316 (12.2%)  | 350 (13.5%)  | 330 (12.7%)  | 303 (11.7%)  |
| <b>7-day accelerometer: minutes spent doing MVPA (<math>\geq 125</math> mg)</b>                                          |              |              |              |              |              |
| <b>Mean (SD)</b>                                                                                                         | 74.0 (35.3)  | 75.9 (36.8)  | 75.4 (36.4)  | 76.1 (36.1)  | 77.8 (35.6)  |
| <b>7-day accelerometer: minutes spent doing moderate activity (<math>\geq 125</math> mg and <math>&lt;425</math> mg)</b> |              |              |              |              |              |
| <b>Mean (SD)</b>                                                                                                         | 70.2 (32.7)  | 71.9 (33.9)  | 71.6 (33.8)  | 72.0 (33.4)  | 73.9 (33.0)  |
| <b>7-day accelerometer: minutes spent doing vigorous activity (<math>\geq 425</math> mg)</b>                             |              |              |              |              |              |
| <b>Mean (SD)</b>                                                                                                         | 3.83 (5.31)  | 4.04 (6.13)  | 3.84 (5.37)  | 4.02 (5.57)  | 3.91 (5.67)  |
| <b>Non-commuting transport</b>                                                                                           |              |              |              |              |              |
| <b>Car/motor vehicle</b>                                                                                                 | 1532 (59.0%) | 1238 (47.7%) | 1163 (44.8%) | 1049 (40.4%) | 782 (30.1%)  |
| <b>Cycle</b>                                                                                                             | 29 (1.1%)    | 52 (2.0%)    | 53 (2.0%)    | 72 (2.8%)    | 90 (3.5%)    |
| <b>Walk</b>                                                                                                              | 325 (12.5%)  | 487 (18.8%)  | 572 (22.0%)  | 696 (26.8%)  | 849 (32.7%)  |
| <b>Public transport</b>                                                                                                  | 163 (6.3%)   | 221 (8.5%)   | 230 (8.9%)   | 259 (10.0%)  | 287 (11.1%)  |
| <b>Missing</b>                                                                                                           | 549 (21.1%)  | 599 (23.0%)  | 579 (22.3%)  | 516 (20.1%)  | 589 (22.7%)  |
| <b>Commuting transport</b>                                                                                               |              |              |              |              |              |
| <b>Car/motor vehicle</b>                                                                                                 | 632 (24.3%)  | 594 (22.9%)  | 535 (20.6%)  | 466 (17.9%)  | 349 (13.4%)  |
| <b>Cycle</b>                                                                                                             | 21 (0.8%)    | 51 (2.0%)    | 56 (2.2%)    | 84 (3.2%)    | 114 (4.4%)   |
| <b>Walk</b>                                                                                                              | 177 (6.8%)   | 200 (7.7%)   | 264 (10.2%)  | 291 (11.2%)  | 408 (15.7%)  |
| <b>Public transport</b>                                                                                                  | 214 (8.2%)   | 288 (11.1%)  | 314 (12.1%)  | 340 (13.1%)  | 414 (15.9%)  |
| <b>Missing</b>                                                                                                           | 1554 (59.8%) | 1464 (56.3%) | 1428 (54.9%) | 1416 (54.5%) | 1312 (50.5%) |

**Table S9:** Baseline characteristics of UK Biobank participants with 7-day accelerometer information (n = 12,986) by quintiles of *tree-cover walkability*; all study participants resided within Greater London administrative boundaries at study baseline (2006-2010).

|                                                                                       | <b>Ground-cover walkability quintiles</b> |                 |                 |                 |                 |
|---------------------------------------------------------------------------------------|-------------------------------------------|-----------------|-----------------|-----------------|-----------------|
|                                                                                       | <b>Q1</b>                                 | <b>Q2</b>       | <b>Q3</b>       | <b>Q4</b>       | <b>Q5</b>       |
|                                                                                       | <b>(N=2598)</b>                           | <b>(N=2597)</b> | <b>(N=2597)</b> | <b>(N=2597)</b> | <b>(N=2597)</b> |
| <b>Age at baseline (years)</b>                                                        |                                           |                 |                 |                 |                 |
| <b>Mean (SD)</b>                                                                      | 57.7 (7.57)                               | 56.2 (7.99)     | 55.9 (8.05)     | 55.6 (8.11)     | 55.0 (8.08)     |
| <b>Sex</b>                                                                            |                                           |                 |                 |                 |                 |
| <b>Female</b>                                                                         | 1515 (58.3%)                              | 1509 (58.1%)    | 1507 (58.0%)    | 1551 (59.7%)    | 1590 (61.2%)    |
| <b>Male</b>                                                                           | 1083 (41.7%)                              | 1088 (41.9%)    | 1090 (42.0%)    | 1046 (40.3%)    | 1007 (38.8%)    |
| <b>Average total household income before tax (£)</b>                                  |                                           |                 |                 |                 |                 |
| <b>Less than 18,000</b>                                                               | 185 (7.1%)                                | 273 (10.5%)     | 290 (11.2%)     | 292 (11.2%)     | 269 (10.4%)     |
| <b>18,000 to 30,999</b>                                                               | 441 (17.0%)                               | 436 (16.8%)     | 454 (17.5%)     | 438 (16.9%)     | 393 (15.1%)     |
| <b>31,000 to 51,999</b>                                                               | 606 (23.3%)                               | 609 (23.5%)     | 653 (25.1%)     | 629 (24.2%)     | 557 (21.4%)     |
| <b>52,000 to 100,000</b>                                                              | 759 (29.2%)                               | 686 (26.4%)     | 661 (25.5%)     | 656 (25.3%)     | 718 (27.6%)     |
| <b>Greater than 100,000</b>                                                           | 317 (12.2%)                               | 344 (13.2%)     | 295 (11.4%)     | 333 (12.8%)     | 459 (17.7%)     |
| <b>Missing</b>                                                                        | 290 (11.2%)                               | 249 (9.6%)      | 244 (9.4%)      | 249 (9.6%)      | 201 (7.7%)      |
| <b>Index of Multiple Deprivation (small-area level)</b>                               |                                           |                 |                 |                 |                 |
| <b>Low deprivation</b>                                                                | 1766 (68.0%)                              | 1182 (45.5%)    | 942 (36.3%)     | 595 (22.9%)     | 338 (13.0%)     |
| <b>Medium deprivation</b>                                                             | 748 (28.8%)                               | 1129 (43.5%)    | 1246 (48.0%)    | 1387 (53.4%)    | 1230 (47.4%)    |
| <b>High deprivation</b>                                                               | 84 (3.2%)                                 | 286 (11.0%)     | 409 (15.7%)     | 615 (23.7%)     | 1029 (39.6%)    |
| <b>IPAQ activity group</b>                                                            |                                           |                 |                 |                 |                 |
| <b>Low</b>                                                                            | 365 (14.0%)                               | 371 (14.3%)     | 320 (12.3%)     | 355 (13.7%)     | 302 (11.6%)     |
| <b>Moderate</b>                                                                       | 987 (38.0%)                               | 1012 (39.0%)    | 1012 (39.0%)    | 987 (38.0%)     | 1043 (40.2%)    |
| <b>High</b>                                                                           | 907 (34.9%)                               | 898 (34.6%)     | 915 (35.2%)     | 925 (35.6%)     | 949 (36.5%)     |
| <b>Missing</b>                                                                        | 339 (13.0%)                               | 316 (12.2%)     | 350 (13.5%)     | 330 (12.7%)     | 303 (11.7%)     |
| <b>Achieved UK physical activity recommendations via MVPA and walking<sup>1</sup></b> |                                           |                 |                 |                 |                 |
| <b>Yes</b>                                                                            | 1897 (73.0%)                              | 1905 (73.4%)    | 1935 (74.5%)    | 1927 (74.2%)    | 1988 (76.5%)    |
| <b>No</b>                                                                             | 362 (13.9%)                               | 376 (14.5%)     | 312 (12.0%)     | 340 (13.1%)     | 306 (11.8%)     |
| <b>Missing</b>                                                                        | 339 (13.0%)                               | 316 (12.2%)     | 350 (13.5%)     | 330 (12.7%)     | 303 (11.7%)     |
| <b>Achieved UK physical activity recommendations via MVPA only<sup>1</sup></b>        |                                           |                 |                 |                 |                 |
| <b>Yes</b>                                                                            | 1255 (48.3%)                              | 1237 (47.6%)    | 1258 (48.4%)    | 1244 (47.9%)    | 1300 (50.1%)    |
| <b>No</b>                                                                             | 1004 (38.6%)                              | 1044 (40.2%)    | 989 (38.1%)     | 1023 (39.4%)    | 994 (38.3%)     |
| <b>Missing</b>                                                                        | 339 (13.0%)                               | 316 (12.2%)     | 350 (13.5%)     | 330 (12.7%)     | 303 (11.7%)     |
| <b>7-day accelerometer: minutes spent doing MVPA (<math>\geq 125</math> mg)</b>       |                                           |                 |                 |                 |                 |

|                                                                                                                          |              |              |              |              |              |
|--------------------------------------------------------------------------------------------------------------------------|--------------|--------------|--------------|--------------|--------------|
| <b>Mean (SD)</b>                                                                                                         | 74.0 (35.3)  | 75.9 (36.8)  | 75.4 (36.4)  | 76.1 (36.1)  | 77.8 (35.6)  |
| <b>7-day accelerometer: minutes spent doing moderate activity (<math>\geq 125</math> mg and <math>&lt;425</math> mg)</b> |              |              |              |              |              |
| <b>Mean (SD)</b>                                                                                                         | 70.2 (32.7)  | 71.9 (33.9)  | 71.6 (33.8)  | 72.0 (33.4)  | 73.9 (33.0)  |
| <b>7-day accelerometer: minutes spent doing vigorous activity (<math>\geq 425</math> mg)</b>                             |              |              |              |              |              |
| <b>Mean (SD)</b>                                                                                                         | 3.83 (5.31)  | 4.04 (6.13)  | 3.84 (5.37)  | 4.02 (5.57)  | 3.91 (5.67)  |
| <b>Non-commuting transport</b>                                                                                           |              |              |              |              |              |
| <b>Car/motor vehicle</b>                                                                                                 | 1532 (59.0%) | 1238 (47.7%) | 1163 (44.8%) | 1049 (40.4%) | 782 (30.1%)  |
| <b>Cycle</b>                                                                                                             | 29 (1.1%)    | 52 (2.0%)    | 53 (2.0%)    | 72 (2.8%)    | 90 (3.5%)    |
| <b>Walk</b>                                                                                                              | 325 (12.5%)  | 487 (18.8%)  | 572 (22.0%)  | 696 (26.8%)  | 849 (32.7%)  |
| <b>Public transport</b>                                                                                                  | 163 (6.3%)   | 221 (8.5%)   | 230 (8.9%)   | 259 (10.0%)  | 287 (11.1%)  |
| <b>Missing</b>                                                                                                           | 549 (21.1%)  | 599 (23.0%)  | 579 (22.3%)  | 516 (20.1%)  | 589 (22.7%)  |
| <b>Commuting transport</b>                                                                                               |              |              |              |              |              |
| <b>Car/motor vehicle</b>                                                                                                 | 632 (24.3%)  | 594 (22.9%)  | 535 (20.6%)  | 466 (17.9%)  | 349 (13.4%)  |
| <b>Cycle</b>                                                                                                             | 21 (0.8%)    | 51 (2.0%)    | 56 (2.2%)    | 84 (3.2%)    | 114 (4.4%)   |
| <b>Walk</b>                                                                                                              | 177 (6.8%)   | 200 (7.7%)   | 264 (10.2%)  | 291 (11.2%)  | 408 (15.7%)  |
| <b>Public transport</b>                                                                                                  | 214 (8.2%)   | 288 (11.1%)  | 314 (12.1%)  | 340 (13.1%)  | 414 (15.9%)  |
| <b>Missing</b>                                                                                                           | 1554 (59.8%) | 1464 (56.3%) | 1428 (54.9%) | 1416 (54.5%) | 1312 (50.5%) |

**Table S10:** Baseline characteristics of UK Biobank participants with non-commuting transport information (n = 44,998) by quintiles of *walkability*; all study participants resided within Greater London administrative boundaries at study baseline (2006-2010).

|                                                                    | <b>Walkability Quintiles</b> |                 |                 |                 |                 |
|--------------------------------------------------------------------|------------------------------|-----------------|-----------------|-----------------|-----------------|
|                                                                    | <b>Q1</b>                    | <b>Q2</b>       | <b>Q3</b>       | <b>Q4</b>       | <b>Q5</b>       |
|                                                                    | <b>(N=9021)</b>              | <b>(N=8994)</b> | <b>(N=8998)</b> | <b>(N=8988)</b> | <b>(N=8997)</b> |
| <b>Age at baseline (years)</b>                                     |                              |                 |                 |                 |                 |
| Mean (SD)                                                          | 57.6 (7.87)                  | 56.5 (8.26)     | 55.7 (8.24)     | 55.2 (8.36)     | 55.0 (8.27)     |
| <b>Sex</b>                                                         |                              |                 |                 |                 |                 |
| Female                                                             | 5040 (55.9%)                 | 5008 (55.7%)    | 4991 (55.5%)    | 5032 (56.0%)    | 4944 (55.0%)    |
| Male                                                               | 3981 (44.1%)                 | 3986 (44.3%)    | 4007 (44.5%)    | 3956 (44.0%)    | 4053 (45.0%)    |
| <b>Average total household income before tax (£)</b>               |                              |                 |                 |                 |                 |
| Less than 18,000                                                   | 975 (10.8%)                  | 1339 (14.9%)    | 1452 (16.1%)    | 1508 (16.8%)    | 1633 (18.2%)    |
| 18,000 to 30,999                                                   | 1606 (17.8%)                 | 1648 (18.3%)    | 1621 (18.0%)    | 1556 (17.3%)    | 1460 (16.2%)    |
| 31,000 to 51,999                                                   | 2092 (23.2%)                 | 1926 (21.4%)    | 1941 (21.6%)    | 1829 (20.3%)    | 1604 (17.8%)    |
| 52,000 to 100,000                                                  | 2134 (23.7%)                 | 1946 (21.6%)    | 1775 (19.7%)    | 1752 (19.5%)    | 1744 (19.4%)    |
| Greater than 100,000                                               | 791 (8.8%)                   | 701 (7.8%)      | 824 (9.2%)      | 952 (10.6%)     | 1232 (13.7%)    |
| Missing                                                            | 1423 (15.8%)                 | 1434 (15.9%)    | 1385 (15.4%)    | 1391 (15.5%)    | 1324 (14.7%)    |
| <b>Index of Multiple Deprivation (small-area level)</b>            |                              |                 |                 |                 |                 |
| Medium deprivation                                                 | 544 (6.0%)                   | 1228 (13.7%)    | 1735 (19.3%)    | 2744 (30.5%)    | 4909 (54.6%)    |
| Low deprivation                                                    | 2707 (30.0%)                 | 3778 (42.0%)    | 4789 (53.2%)    | 4542 (50.5%)    | 3766 (41.9%)    |
| High deprivation                                                   | 5770 (64.0%)                 | 3988 (44.3%)    | 2474 (27.5%)    | 1702 (18.9%)    | 322 (3.6%)      |
| <b>IPAQ activity group</b>                                         |                              |                 |                 |                 |                 |
| Low                                                                | 1356 (15.0%)                 | 1265 (14.1%)    | 1239 (13.8%)    | 1248 (13.9%)    | 1121 (12.5%)    |
| Moderate                                                           | 3259 (36.1%)                 | 3189 (35.5%)    | 3282 (36.5%)    | 3336 (37.1%)    | 3442 (38.3%)    |
| High                                                               | 2882 (31.9%)                 | 2977 (33.1%)    | 2907 (32.3%)    | 2955 (32.9%)    | 3023 (33.6%)    |
| Missing                                                            | 1524 (16.9%)                 | 1563 (17.4%)    | 1570 (17.4%)    | 1449 (16.1%)    | 1411 (15.7%)    |
| <b>Achieved UK physical activity recommendations via MVPA only</b> |                              |                 |                 |                 |                 |
| Yes                                                                | 6159 (68.3%)                 | 6171 (68.6%)    | 6194 (68.8%)    | 6342 (70.6%)    | 6464 (71.8%)    |
| No                                                                 | 1335 (14.8%)                 | 1258 (14.0%)    | 1230 (13.7%)    | 1196 (13.3%)    | 1119 (12.4%)    |
| Missing                                                            | 1527 (16.9%)                 | 1565 (17.4%)    | 1574 (17.5%)    | 1450 (16.1%)    | 1414 (15.7%)    |
| <b>Achieved UK physical activity recommendations via MVPA only</b> |                              |                 |                 |                 |                 |
| Yes                                                                | 4007 (44.4%)                 | 4066 (45.2%)    | 4030 (44.8%)    | 4032 (44.9%)    | 4087 (45.4%)    |
| No                                                                 | 3490 (38.7%)                 | 3365 (37.4%)    | 3398 (37.8%)    | 3507 (39.0%)    | 3499 (38.9%)    |
| Missing                                                            | 1524 (16.9%)                 | 1563 (17.4%)    | 1570 (17.4%)    | 1449 (16.1%)    | 1411 (15.7%)    |
| <b>Non-commuting transport</b>                                     |                              |                 |                 |                 |                 |
| <b>Car/motor vehicle</b>                                           | 6894 (76.4%)                 | 5833 (64.9%)    | 5052 (56.1%)    | 4302 (47.9%)    | 3003 (33.4%)    |
| <b>Cycle</b>                                                       | 116 (1.3%)                   | 162 (1.8%)      | 193 (2.1%)      | 198 (2.2%)      | 348 (3.9%)      |
| <b>Walk</b>                                                        | 1251 (13.9%)                 | 1881 (20.9%)    | 2366 (26.3%)    | 2823 (31.4%)    | 3610 (40.1%)    |
| <b>Public transport</b>                                            | 760 (8.4%)                   | 1118 (12.4%)    | 1387 (15.4%)    | 1665 (18.5%)    | 2036 (22.6%)    |
| <b>Commuting transport</b>                                         |                              |                 |                 |                 |                 |
| <b>Car/motor vehicle</b>                                           | 3041 (33.7%)                 | 2836 (31.5%)    | 2535 (28.2%)    | 1966 (21.9%)    | 1301 (14.5%)    |
| <b>Cycle</b>                                                       | 104 (1.2%)                   | 174 (1.9%)      | 190 (2.1%)      | 229 (2.5%)      | 396 (4.4%)      |
| <b>Walk</b>                                                        | 563 (6.2%)                   | 701 (7.8%)      | 855 (9.5%)      | 1063 (11.8%)    | 1558 (17.3%)    |

|                  |              |              |              |              |              |
|------------------|--------------|--------------|--------------|--------------|--------------|
| Public transport | 870 (9.6%)   | 1139 (12.7%) | 1425 (15.8%) | 1758 (19.6%) | 1906 (21.2%) |
| Missing          | 4443 (49.3%) | 4144 (46.1%) | 3993 (44.4%) | 3972 (44.2%) | 3836 (42.6%) |

**Table S11:** Baseline characteristics of UK Biobank participants with non-commuting transport information (n = 44,998) by quintiles of *green walkability*; all study participants resided within Greater London administrative boundaries at study baseline (2006-2010).

|                                                                    | Green walkability quintiles |              |              |              |              |
|--------------------------------------------------------------------|-----------------------------|--------------|--------------|--------------|--------------|
|                                                                    | Q1                          | Q2           | Q3           | Q4           | Q5           |
|                                                                    | (N=9012)                    | (N=8988)     | (N=9003)     | (N=8995)     | (N=9000)     |
| <b>Age at baseline (years)</b>                                     |                             |              |              |              |              |
| Mean (SD)                                                          | 57.3 (7.94)                 | 56.1 (8.27)  | 55.8 (8.36)  | 55.6 (8.25)  | 55.1 (8.29)  |
| <b>Sex</b>                                                         |                             |              |              |              |              |
| Female                                                             | 5050 (56.0%)                | 4962 (55.2%) | 5054 (56.1%) | 4998 (55.6%) | 4951 (55.0%) |
| Male                                                               | 3962 (44.0%)                | 4026 (44.8%) | 3949 (43.9%) | 3997 (44.4%) | 4049 (45.0%) |
| <b>Average total household income before tax (£)</b>               |                             |              |              |              |              |
| Less than 18,000                                                   | 1091 (12.1%)                | 1385 (15.4%) | 1473 (16.4%) | 1418 (15.8%) | 1540 (17.1%) |
| 18,000 to 30,999                                                   | 1660 (18.4%)                | 1630 (18.1%) | 1674 (18.6%) | 1479 (16.4%) | 1448 (16.1%) |
| 31,000 to 51,999                                                   | 2065 (22.9%)                | 1937 (21.6%) | 1869 (20.8%) | 1882 (20.9%) | 1639 (18.2%) |
| 52,000 to 100,000                                                  | 2054 (22.8%)                | 1921 (21.4%) | 1718 (19.1%) | 1826 (20.3%) | 1832 (20.4%) |
| Greater than 100,000                                               | 644 (7.1%)                  | 665 (7.4%)   | 889 (9.9%)   | 1046 (11.6%) | 1256 (14.0%) |
| Missing                                                            | 1498 (16.6%)                | 1450 (16.1%) | 1380 (15.3%) | 1344 (14.9%) | 1285 (14.3%) |
| <b>Index of Multiple Deprivation (small-area level)</b>            |                             |              |              |              |              |
| Medium deprivation                                                 | 789 (8.8%)                  | 1545 (17.2%) | 1918 (21.3%) | 2421 (26.9%) | 4487 (49.9%) |
| Low deprivation                                                    | 2990 (33.2%)                | 4147 (46.1%) | 4365 (48.5%) | 4222 (46.9%) | 3858 (42.9%) |
| High deprivation                                                   | 5233 (58.1%)                | 3296 (36.7%) | 2720 (30.2%) | 2352 (26.1%) | 655 (7.3%)   |
| <b>IPAQ activity group</b>                                         |                             |              |              |              |              |
| Low                                                                | 1329 (14.7%)                | 1282 (14.3%) | 1241 (13.8%) | 1259 (14.0%) | 1118 (12.4%) |
| Moderate                                                           | 3197 (35.5%)                | 3275 (36.4%) | 3284 (36.5%) | 3225 (35.9%) | 3527 (39.2%) |
| High                                                               | 2890 (32.1%)                | 2827 (31.5%) | 2955 (32.8%) | 3069 (34.1%) | 3003 (33.4%) |
| Missing                                                            | 1596 (17.7%)                | 1604 (17.8%) | 1523 (16.9%) | 1442 (16.0%) | 1352 (15.0%) |
| <b>Achieved UK physical activity recommendations via MVPA only</b> |                             |              |              |              |              |
| Yes                                                                | 6117 (67.9%)                | 6101 (67.9%) | 6243 (69.3%) | 6337 (70.5%) | 6532 (72.6%) |
| No                                                                 | 1295 (14.4%)                | 1281 (14.3%) | 1235 (13.7%) | 1213 (13.5%) | 1114 (12.4%) |
| Missing                                                            | 1600 (17.8%)                | 1606 (17.9%) | 1525 (16.9%) | 1445 (16.1%) | 1354 (15.0%) |
| <b>Achieved UK physical activity recommendations via MVPA only</b> |                             |              |              |              |              |
| Yes                                                                | 3993 (44.3%)                | 3914 (43.5%) | 4052 (45.0%) | 4124 (45.8%) | 4139 (46.0%) |
| No                                                                 | 3423 (38.0%)                | 3470 (38.6%) | 3428 (38.1%) | 3429 (38.1%) | 3509 (39.0%) |
| Missing                                                            | 1596 (17.7%)                | 1604 (17.8%) | 1523 (16.9%) | 1442 (16.0%) | 1352 (15.0%) |
| <b>Non-commuting transport</b>                                     |                             |              |              |              |              |
| Car/motor vehicle                                                  | 6720 (74.6%)                | 5687 (63.3%) | 4982 (55.3%) | 4405 (49.0%) | 3290 (36.6%) |
| Cycle                                                              | 90 (1.0%)                   | 180 (2.0%)   | 187 (2.1%)   | 222 (2.5%)   | 338 (3.8%)   |
| Walk                                                               | 1387 (15.4%)                | 1918 (21.3%) | 2377 (26.4%) | 2816 (31.3%) | 3433 (38.1%) |
| Public transport                                                   | 815 (9.0%)                  | 1203 (13.4%) | 1457 (16.2%) | 1552 (17.3%) | 1939 (21.5%) |
| <b>Commuting transport</b>                                         |                             |              |              |              |              |
| Car/motor vehicle                                                  | 3006 (33.4%)                | 2818 (31.4%) | 2392 (26.6%) | 1998 (22.2%) | 1465 (16.3%) |
| Cycle                                                              | 103 (1.1%)                  | 168 (1.9%)   | 197 (2.2%)   | 244 (2.7%)   | 381 (4.2%)   |
| Walk                                                               | 602 (6.7%)                  | 710 (7.9%)   | 899 (10.0%)  | 1078 (12.0%) | 1451 (16.1%) |
| Public transport                                                   | 951 (10.6%)                 | 1211 (13.5%) | 1480 (16.4%) | 1593 (17.7%) | 1863 (20.7%) |
| Missing                                                            | 4350 (48.3%)                | 4081 (45.4%) | 4035 (44.8%) | 4082 (45.4%) | 3840 (42.7%) |

**Table S12:** Baseline characteristics of UK Biobank participants with non-commuting transport information (n = 44,998) by quintiles of *ground-cover walkability*; all study participants resided within Greater London administrative boundaries at study baseline (2006-2010).

|                                                      | Ground-cover walkability quintiles |              |              |              |              |
|------------------------------------------------------|------------------------------------|--------------|--------------|--------------|--------------|
|                                                      | Q1                                 | Q2           | Q3           | Q4           | Q5           |
|                                                      | (N=9023)                           | (N=8992)     | (N=8989)     | (N=8997)     | (N=8997)     |
| <b>Age at baseline (years)</b>                       |                                    |              |              |              |              |
| Mean (SD)                                            | 57.7 (7.82)                        | 56.0 (8.25)  | 55.7 (8.31)  | 55.4 (8.34)  | 55.0 (8.30)  |
| <b>Sex</b>                                           |                                    |              |              |              |              |
| Female                                               | 5070 (56.2%)                       | 4998 (55.6%) | 4961 (55.2%) | 5003 (55.6%) | 4983 (55.4%) |
| Male                                                 | 3953 (43.8%)                       | 3994 (44.4%) | 4028 (44.8%) | 3994 (44.4%) | 4014 (44.6%) |
| <b>Average total household income before tax (£)</b> |                                    |              |              |              |              |

|                                                                    |              |              |              |              |              |
|--------------------------------------------------------------------|--------------|--------------|--------------|--------------|--------------|
| Less than 18,000                                                   | 929 (10.3%)  | 1341 (14.9%) | 1509 (16.8%) | 1558 (17.3%) | 1570 (17.5%) |
| 18,000 to 30,999                                                   | 1563 (17.3%) | 1602 (17.8%) | 1702 (18.9%) | 1600 (17.8%) | 1424 (15.8%) |
| 31,000 to 51,999                                                   | 2030 (22.5%) | 1958 (21.8%) | 1908 (21.2%) | 1836 (20.4%) | 1660 (18.5%) |
| 52,000 to 100,000                                                  | 2223 (24.6%) | 1947 (21.7%) | 1694 (18.8%) | 1671 (18.6%) | 1816 (20.2%) |
| Greater than 100,000                                               | 875 (9.7%)   | 810 (9.0%)   | 750 (8.3%)   | 877 (9.7%)   | 1188 (13.2%) |
| Missing                                                            | 1403 (15.5%) | 1334 (14.8%) | 1426 (15.9%) | 1455 (16.2%) | 1339 (14.9%) |
| <b>Index of Multiple Deprivation (small-area level)</b>            |              |              |              |              |              |
| Medium deprivation                                                 | 486 (5.4%)   | 1430 (15.9%) | 2051 (22.8%) | 2821 (31.4%) | 4372 (48.6%) |
| Low deprivation                                                    | 2724 (30.2%) | 4019 (44.7%) | 4478 (49.8%) | 4580 (50.9%) | 3781 (42.0%) |
| High deprivation                                                   | 5813 (64.4%) | 3543 (39.4%) | 2460 (27.4%) | 1596 (17.7%) | 844 (9.4%)   |
| <b>IPAQ activity group</b>                                         |              |              |              |              |              |
| Low                                                                | 1302 (14.4%) | 1275 (14.2%) | 1254 (14.0%) | 1269 (14.1%) | 1129 (12.5%) |
| Moderate                                                           | 3318 (36.8%) | 3298 (36.7%) | 3263 (36.3%) | 3169 (35.2%) | 3460 (38.5%) |
| High                                                               | 2958 (32.8%) | 2904 (32.3%) | 2872 (32.0%) | 3001 (33.4%) | 3009 (33.4%) |
| Missing                                                            | 1445 (16.0%) | 1515 (16.8%) | 1600 (17.8%) | 1558 (17.3%) | 1399 (15.5%) |
| <b>Achieved UK physical activity recommendations via MVPA only</b> |              |              |              |              |              |
| Yes                                                                | 6300 (69.8%) | 6198 (68.9%) | 6139 (68.3%) | 6231 (69.3%) | 6462 (71.8%) |
| No                                                                 | 1275 (14.1%) | 1276 (14.2%) | 1247 (13.9%) | 1206 (13.4%) | 1134 (12.6%) |
| Missing                                                            | 1448 (16.0%) | 1518 (16.9%) | 1603 (17.8%) | 1560 (17.3%) | 1401 (15.6%) |
| <b>Achieved UK physical activity recommendations via MVPA only</b> |              |              |              |              |              |
| Yes                                                                | 4087 (45.3%) | 4014 (44.6%) | 3960 (44.1%) | 4046 (45.0%) | 4115 (45.7%) |
| No                                                                 | 3491 (38.7%) | 3463 (38.5%) | 3429 (38.1%) | 3393 (37.7%) | 3483 (38.7%) |
| Missing                                                            | 1445 (16.0%) | 1515 (16.8%) | 1600 (17.8%) | 1558 (17.3%) | 1399 (15.5%) |
| <b>Non-commuting transport</b>                                     |              |              |              |              |              |
| Car/motor vehicle                                                  | 6626 (73.4%) | 5620 (62.5%) | 5017 (55.8%) | 4426 (49.2%) | 3395 (37.7%) |
| Cycle                                                              | 101 (1.1%)   | 201 (2.2%)   | 189 (2.1%)   | 210 (2.3%)   | 316 (3.5%)   |
| Walk                                                               | 1459 (16.2%) | 2033 (22.6%) | 2342 (26.1%) | 2707 (30.1%) | 3390 (37.7%) |
| Public transport                                                   | 837 (9.3%)   | 1138 (12.7%) | 1441 (16.0%) | 1654 (18.4%) | 1896 (21.1%) |
| <b>Commuting transport</b>                                         |              |              |              |              |              |
| Car/motor vehicle                                                  | 2828 (31.3%) | 2748 (30.6%) | 2464 (27.4%) | 2101 (23.4%) | 1538 (17.1%) |
| Cycle                                                              | 101 (1.1%)   | 199 (2.2%)   | 192 (2.1%)   | 238 (2.6%)   | 363 (4.0%)   |
| Walk                                                               | 630 (7.0%)   | 778 (8.7%)   | 883 (9.8%)   | 1031 (11.5%) | 1418 (15.8%) |
| Public transport                                                   | 959 (10.6%)  | 1248 (13.9%) | 1449 (16.1%) | 1609 (17.9%) | 1833 (20.4%) |
| Missing                                                            | 4505 (49.9%) | 4019 (44.7%) | 4001 (44.5%) | 4018 (44.7%) | 3845 (42.7%) |

**Table S13:** Baseline characteristics of UK Biobank participants with non-commuting transport information (n = 44,998) by quintiles of *tree-cover walkability*; all study participants resided within Greater London administrative boundaries at study baseline (2006-2010).

|                                                                    | <b>Tree-cover walkability quintiles</b> |                 |                 |                 |                 |
|--------------------------------------------------------------------|-----------------------------------------|-----------------|-----------------|-----------------|-----------------|
|                                                                    | <b>Q1</b>                               | <b>Q2</b>       | <b>Q3</b>       | <b>Q4</b>       | <b>Q5</b>       |
|                                                                    | <b>(N=9003)</b>                         | <b>(N=8996)</b> | <b>(N=8996)</b> | <b>(N=9005)</b> | <b>(N=8998)</b> |
| <b>Age at baseline (years)</b>                                     |                                         |                 |                 |                 |                 |
| Mean (SD)                                                          | 56.8 (8.15)                             | 56.5 (8.13)     | 55.9 (8.36)     | 55.3 (8.25)     | 55.3 (8.27)     |
| <b>Sex</b>                                                         |                                         |                 |                 |                 |                 |
| Female                                                             | 4976 (55.3%)                            | 5014 (55.7%)    | 5100 (56.7%)    | 4989 (55.4%)    | 4936 (54.9%)    |
| Male                                                               | 4027 (44.7%)                            | 3982 (44.3%)    | 3896 (43.3%)    | 4016 (44.6%)    | 4062 (45.1%)    |
| <b>Average total household income before tax (£)</b>               |                                         |                 |                 |                 |                 |
| Less than 18,000                                                   | 1321 (14.7%)                            | 1336 (14.9%)    | 1280 (14.2%)    | 1412 (15.7%)    | 1558 (17.3%)    |
| 18,000 to 30,999                                                   | 1730 (19.2%)                            | 1660 (18.5%)    | 1550 (17.2%)    | 1540 (17.1%)    | 1411 (15.7%)    |
| 31,000 to 51,999                                                   | 2039 (22.6%)                            | 1972 (21.9%)    | 1936 (21.5%)    | 1817 (20.2%)    | 1628 (18.1%)    |
| 52,000 to 100,000                                                  | 1840 (20.4%)                            | 1896 (21.1%)    | 1914 (21.3%)    | 1892 (21.0%)    | 1809 (20.1%)    |
| Greater than 100,000                                               | 494 (5.5%)                              | 617 (6.9%)      | 1011 (11.2%)    | 1077 (12.0%)    | 1301 (14.5%)    |
| Missing                                                            | 1579 (17.5%)                            | 1515 (16.8%)    | 1305 (14.5%)    | 1267 (14.1%)    | 1291 (14.3%)    |
| <b>Index of Multiple Deprivation (small-area level)</b>            |                                         |                 |                 |                 |                 |
| Medium deprivation                                                 | 1256 (14.0%)                            | 1338 (14.9%)    | 1520 (16.9%)    | 2461 (27.3%)    | 4585 (51.0%)    |
| Low deprivation                                                    | 3330 (37.0%)                            | 3927 (43.7%)    | 4318 (48.0%)    | 4020 (44.6%)    | 3987 (44.3%)    |
| High deprivation                                                   | 4417 (49.1%)                            | 3731 (41.5%)    | 3158 (35.1%)    | 2524 (28.0%)    | 426 (4.7%)      |
| <b>IPAQ activity group</b>                                         |                                         |                 |                 |                 |                 |
| Low                                                                | 1345 (14.9%)                            | 1309 (14.6%)    | 1218 (13.5%)    | 1247 (13.8%)    | 1110 (12.3%)    |
| Moderate                                                           | 3096 (34.4%)                            | 3195 (35.5%)    | 3324 (36.9%)    | 3407 (37.8%)    | 3486 (38.7%)    |
| High                                                               | 2835 (31.5%)                            | 2870 (31.9%)    | 3019 (33.6%)    | 3001 (33.3%)    | 3019 (33.6%)    |
| Missing                                                            | 1727 (19.2%)                            | 1622 (18.0%)    | 1435 (16.0%)    | 1350 (15.0%)    | 1383 (15.4%)    |
| <b>Achieved UK physical activity recommendations via MVPA only</b> |                                         |                 |                 |                 |                 |

|                                                                    |              |              |              |              |              |
|--------------------------------------------------------------------|--------------|--------------|--------------|--------------|--------------|
| Yes                                                                | 5937 (65.9%) | 6096 (67.8%) | 6343 (70.5%) | 6438 (71.5%) | 6516 (72.4%) |
| No                                                                 | 1336 (14.8%) | 1275 (14.2%) | 1218 (13.5%) | 1212 (13.5%) | 1097 (12.2%) |
| Missing                                                            | 1730 (19.2%) | 1625 (18.1%) | 1435 (16.0%) | 1355 (15.0%) | 1385 (15.4%) |
| <b>Achieved UK physical activity recommendations via MVPA only</b> |              |              |              |              |              |
| Yes                                                                | 3909 (43.4%) | 3949 (43.9%) | 4131 (45.9%) | 4113 (45.7%) | 4120 (45.8%) |
| No                                                                 | 3367 (37.4%) | 3425 (38.1%) | 3430 (38.1%) | 3542 (39.3%) | 3495 (38.8%) |
| Missing                                                            | 1727 (19.2%) | 1622 (18.0%) | 1435 (16.0%) | 1350 (15.0%) | 1383 (15.4%) |
| <b>Non-commuting transport</b>                                     |              |              |              |              |              |
| Car/motor vehicle                                                  | 6542 (72.7%) | 5939 (66.0%) | 5187 (57.7%) | 4262 (47.3%) | 3154 (35.1%) |
| Cycle                                                              | 120 (1.3%)   | 127 (1.4%)   | 203 (2.3%)   | 232 (2.6%)   | 335 (3.7%)   |
| Walk                                                               | 1405 (15.6%) | 1830 (20.3%) | 2270 (25.2%) | 2889 (32.1%) | 3537 (39.3%) |
| Public transport                                                   | 936 (10.4%)  | 1100 (12.2%) | 1336 (14.9%) | 1622 (18.0%) | 1972 (21.9%) |
| <b>Commuting transport</b>                                         |              |              |              |              |              |
| Car/motor vehicle                                                  | 3189 (35.4%) | 2847 (31.6%) | 2392 (26.6%) | 1903 (21.1%) | 1348 (15.0%) |
| Cycle                                                              | 106 (1.2%)   | 149 (1.7%)   | 195 (2.2%)   | 262 (2.9%)   | 381 (4.2%)   |
| Walk                                                               | 554 (6.2%)   | 721 (8.0%)   | 816 (9.1%)   | 1137 (12.6%) | 1512 (16.8%) |
| Public transport                                                   | 950 (10.6%)  | 1115 (12.4%) | 1448 (16.1%) | 1723 (19.1%) | 1862 (20.7%) |
| Missing                                                            | 4204 (46.7%) | 4164 (46.3%) | 4145 (46.1%) | 3980 (44.2%) | 3895 (43.3%) |

**Table S14:** Baseline characteristics of UK Biobank participants with commuting transport information and who commuted at least once per week (n = 23,999) by quintiles of *walkability*; all study participants resided within Greater London administrative boundaries at study baseline (2006-2010).

|                                                                    | <b>Walkability Quintiles</b> |                 |                 |                 |                 |
|--------------------------------------------------------------------|------------------------------|-----------------|-----------------|-----------------|-----------------|
|                                                                    | <b>Q1</b>                    | <b>Q2</b>       | <b>Q3</b>       | <b>Q4</b>       | <b>Q5</b>       |
|                                                                    | <b>(N=4804)</b>              | <b>(N=4801)</b> | <b>(N=4798)</b> | <b>(N=4797)</b> | <b>(N=4799)</b> |
| <b>Age at baseline (years)</b>                                     |                              |                 |                 |                 |                 |
| Mean (SD)                                                          | 53.9 (7.24)                  | 52.9 (7.37)     | 52.4 (7.24)     | 52.0 (7.26)     | 52.5 (7.45)     |
| <b>Sex</b>                                                         |                              |                 |                 |                 |                 |
| Female                                                             | 2597 (54.1%)                 | 2566 (53.4%)    | 2575 (53.7%)    | 2575 (53.7%)    | 2612 (54.4%)    |
| Male                                                               | 2207 (45.9%)                 | 2235 (46.6%)    | 2223 (46.3%)    | 2222 (46.3%)    | 2187 (45.6%)    |
| <b>Average total household income before tax (£)</b>               |                              |                 |                 |                 |                 |
| Less than 18,000                                                   | 241 (5.0%)                   | 367 (7.6%)      | 417 (8.7%)      | 373 (7.8%)      | 432 (9.0%)      |
| 18,000 to 30,999                                                   | 666 (13.9%)                  | 786 (16.4%)     | 840 (17.5%)     | 862 (18.0%)     | 831 (17.3%)     |
| 31,000 to 51,999                                                   | 1244 (25.9%)                 | 1214 (25.3%)    | 1256 (26.2%)    | 1166 (24.3%)    | 1082 (22.5%)    |
| 52,000 to 100,000                                                  | 1564 (32.6%)                 | 1401 (29.2%)    | 1243 (25.9%)    | 1231 (25.7%)    | 1204 (25.1%)    |
| Greater than 100,000                                               | 584 (12.2%)                  | 504 (10.5%)     | 567 (11.8%)     | 698 (14.6%)     | 866 (18.0%)     |
| Missing                                                            | 505 (10.5%)                  | 529 (11.0%)     | 475 (9.9%)      | 467 (9.7%)      | 384 (8.0%)      |
| <b>Index of Multiple Deprivation (small-area level)</b>            |                              |                 |                 |                 |                 |
| Low deprivation                                                    | 319 (6.6%)                   | 689 (14.4%)     | 986 (20.6%)     | 1567 (32.7%)    | 2580 (53.8%)    |
| Medium deprivation                                                 | 1505 (31.3%)                 | 2104 (43.8%)    | 2617 (54.5%)    | 2374 (49.5%)    | 2067 (43.1%)    |
| High deprivation                                                   | 2980 (62.0%)                 | 2008 (41.8%)    | 1195 (24.9%)    | 856 (17.8%)     | 152 (3.2%)      |
| <b>IPAQ activity group</b>                                         |                              |                 |                 |                 |                 |
| Low                                                                | 807 (16.8%)                  | 704 (14.7%)     | 669 (13.9%)     | 683 (14.2%)     | 556 (11.6%)     |
| Moderate                                                           | 1792 (37.3%)                 | 1754 (36.5%)    | 1775 (37.0%)    | 1835 (38.3%)    | 1903 (39.7%)    |
| High                                                               | 1477 (30.7%)                 | 1613 (33.6%)    | 1591 (33.2%)    | 1607 (33.5%)    | 1693 (35.3%)    |
| Missing                                                            | 728 (15.2%)                  | 730 (15.2%)     | 763 (15.9%)     | 672 (14.0%)     | 647 (13.5%)     |
| <b>Achieved UK physical activity recommendations via MVPA only</b> |                              |                 |                 |                 |                 |
| Yes                                                                | 3263 (67.9%)                 | 3339 (69.5%)    | 3352 (69.9%)    | 3459 (72.1%)    | 3571 (74.4%)    |
| No                                                                 | 812 (16.9%)                  | 731 (15.2%)     | 682 (14.2%)     | 666 (13.9%)     | 580 (12.1%)     |
| Missing                                                            | 729 (15.2%)                  | 731 (15.2%)     | 764 (15.9%)     | 672 (14.0%)     | 648 (13.5%)     |
| <b>Achieved UK physical activity recommendations via MVPA only</b> |                              |                 |                 |                 |                 |
| Yes                                                                | 2023 (42.1%)                 | 2118 (44.1%)    | 2135 (44.5%)    | 2136 (44.5%)    | 2245 (46.8%)    |
| No                                                                 | 2053 (42.7%)                 | 1953 (40.7%)    | 1900 (39.6%)    | 1989 (41.5%)    | 1907 (39.7%)    |
| Missing                                                            | 728 (15.2%)                  | 730 (15.2%)     | 763 (15.9%)     | 672 (14.0%)     | 647 (13.5%)     |
| <b>Non-commuting transport</b>                                     |                              |                 |                 |                 |                 |
| Car/motor vehicle                                                  | 3719 (77.4%)                 | 3273 (68.2%)    | 2848 (59.4%)    | 2464 (51.4%)    | 1717 (35.8%)    |
| Cycle                                                              | 76 (1.6%)                    | 99 (2.1%)       | 123 (2.6%)      | 128 (2.7%)      | 250 (5.2%)      |
| Walk                                                               | 616 (12.8%)                  | 863 (18.0%)     | 1143 (23.8%)    | 1359 (28.3%)    | 1780 (37.1%)    |
| Public transport                                                   | 382 (8.0%)                   | 551 (11.5%)     | 665 (13.9%)     | 834 (17.4%)     | 1042 (21.7%)    |
| Missing                                                            | 11 (0.2%)                    | 15 (0.3%)       | 19 (0.4%)       | 12 (0.3%)       | 10 (0.2%)       |
| <b>Commuting transport</b>                                         |                              |                 |                 |                 |                 |
| Car/motor vehicle                                                  | 3176 (66.1%)                 | 2789 (58.1%)    | 2399 (50.0%)    | 1825 (38.0%)    | 1185 (24.7%)    |
| Cycle                                                              | 110 (2.3%)                   | 171 (3.6%)      | 192 (4.0%)      | 230 (4.8%)      | 374 (7.8%)      |

|                  |             |              |              |              |              |
|------------------|-------------|--------------|--------------|--------------|--------------|
| Walk             | 596 (12.4%) | 711 (14.8%)  | 831 (17.3%)  | 1037 (21.6%) | 1464 (30.5%) |
| Public transport | 922 (19.2%) | 1130 (23.5%) | 1376 (28.7%) | 1705 (35.5%) | 1776 (37.0%) |

**Table S15:** Baseline characteristics of UK Biobank participants with commuting transport information and who commuted at least once per week (n = 23,999) by quintiles of *green walkability*; all study participants resided within Greater London administrative boundaries at study baseline (2006-2010).

|                                                                    | Green walkability quintiles |                |                |                |                |
|--------------------------------------------------------------------|-----------------------------|----------------|----------------|----------------|----------------|
|                                                                    | Q1<br>(N=4806)              | Q2<br>(N=4798) | Q3<br>(N=4797) | Q4<br>(N=4801) | Q5<br>(N=4797) |
| <b>Age at baseline (years)</b>                                     |                             |                |                |                |                |
| Mean (SD)                                                          | 53.6 (7.23)                 | 52.6 (7.26)    | 52.5 (7.40)    | 52.5 (7.30)    | 52.5 (7.46)    |
| <b>Sex</b>                                                         |                             |                |                |                |                |
| Female                                                             | 2612 (54.3%)                | 2538 (52.9%)   | 2595 (54.1%)   | 2578 (53.7%)   | 2602 (54.2%)   |
| Male                                                               | 2194 (45.7%)                | 2260 (47.1%)   | 2202 (45.9%)   | 2223 (46.3%)   | 2195 (45.8%)   |
| <b>Average total household income before tax (£)</b>               |                             |                |                |                |                |
| Less than 18,000                                                   | 277 (5.8%)                  | 392 (8.2%)     | 399 (8.3%)     | 373 (7.8%)     | 389 (8.1%)     |
| 18,000 to 30,999                                                   | 739 (15.4%)                 | 801 (16.7%)    | 848 (17.7%)    | 794 (16.5%)    | 803 (16.7%)    |
| 31,000 to 51,999                                                   | 1235 (25.7%)                | 1259 (26.2%)   | 1203 (25.1%)   | 1181 (24.6%)   | 1084 (22.6%)   |
| 52,000 to 100,000                                                  | 1515 (31.5%)                | 1387 (28.9%)   | 1217 (25.4%)   | 1254 (26.1%)   | 1270 (26.5%)   |
| Greater than 100,000                                               | 490 (10.2%)                 | 457 (9.5%)     | 648 (13.5%)    | 746 (15.5%)    | 878 (18.3%)    |
| Missing                                                            | 550 (11.4%)                 | 502 (10.5%)    | 482 (10.0%)    | 453 (9.4%)     | 373 (7.8%)     |
| <b>Index of Multiple Deprivation (small-area level)</b>            |                             |                |                |                |                |
| Low deprivation                                                    | 455 (9.5%)                  | 871 (18.2%)    | 1050 (21.9%)   | 1353 (28.2%)   | 2412 (50.3%)   |
| Medium deprivation                                                 | 1689 (35.1%)                | 2260 (47.1%)   | 2376 (49.5%)   | 2269 (47.3%)   | 2073 (43.2%)   |
| High deprivation                                                   | 2662 (55.4%)                | 1667 (34.7%)   | 1371 (28.6%)   | 1179 (24.6%)   | 312 (6.5%)     |
| <b>IPAQ activity group</b>                                         |                             |                |                |                |                |
| Low                                                                | 768 (16.0%)                 | 740 (15.4%)    | 697 (14.5%)    | 638 (13.3%)    | 576 (12.0%)    |
| Moderate                                                           | 1758 (36.6%)                | 1785 (37.2%)   | 1784 (37.2%)   | 1810 (37.7%)   | 1922 (40.1%)   |
| High                                                               | 1516 (31.5%)                | 1536 (32.0%)   | 1591 (33.2%)   | 1660 (34.6%)   | 1678 (35.0%)   |
| Missing                                                            | 764 (15.9%)                 | 737 (15.4%)    | 725 (15.1%)    | 693 (14.4%)    | 621 (12.9%)    |
| <b>Achieved UK physical activity recommendations via MVPA only</b> |                             |                |                |                |                |
| Yes                                                                | 3276 (68.2%)                | 3289 (68.5%)   | 3368 (70.2%)   | 3467 (72.2%)   | 3584 (74.7%)   |
| No                                                                 | 764 (15.9%)                 | 772 (16.1%)    | 704 (14.7%)    | 640 (13.3%)    | 591 (12.3%)    |
| Missing                                                            | 766 (15.9%)                 | 737 (15.4%)    | 725 (15.1%)    | 694 (14.5%)    | 622 (13.0%)    |
| <b>Achieved UK physical activity recommendations via MVPA only</b> |                             |                |                |                |                |
| Yes                                                                | 2030 (42.2%)                | 2051 (42.7%)   | 2134 (44.5%)   | 2174 (45.3%)   | 2268 (47.3%)   |
| No                                                                 | 2012 (41.9%)                | 2010 (41.9%)   | 1938 (40.4%)   | 1934 (40.3%)   | 1908 (39.8%)   |
| Missing                                                            | 764 (15.9%)                 | 737 (15.4%)    | 725 (15.1%)    | 693 (14.4%)    | 621 (12.9%)    |
| <b>Non-commuting transport</b>                                     |                             |                |                |                |                |
| Car/motor vehicle                                                  | 3646 (75.9%)                | 3169 (66.0%)   | 2828 (59.0%)   | 2519 (52.5%)   | 1859 (38.8%)   |
| Cycle                                                              | 61 (1.3%)                   | 114 (2.4%)     | 116 (2.4%)     | 149 (3.1%)     | 236 (4.9%)     |
| Walk                                                               | 665 (13.8%)                 | 923 (19.2%)    | 1120 (23.3%)   | 1347 (28.1%)   | 1706 (35.6%)   |
| Public transport                                                   | 422 (8.8%)                  | 568 (11.8%)    | 721 (15.0%)    | 775 (16.1%)    | 988 (20.6%)    |
| Missing                                                            | 12 (0.2%)                   | 24 (0.5%)      | 12 (0.3%)      | 11 (0.2%)      | 8 (0.2%)       |
| <b>Commuting transport</b>                                         |                             |                |                |                |                |
| Car/motor vehicle                                                  | 3098 (64.5%)                | 2717 (56.6%)   | 2301 (48.0%)   | 1918 (40.0%)   | 1340 (27.9%)   |
| Cycle                                                              | 109 (2.3%)                  | 167 (3.5%)     | 189 (3.9%)     | 249 (5.2%)     | 363 (7.6%)     |
| Walk                                                               | 623 (13.0%)                 | 716 (14.9%)    | 871 (18.2%)    | 1070 (22.3%)   | 1359 (28.3%)   |
| Public transport                                                   | 976 (20.3%)                 | 1198 (25.0%)   | 1436 (29.9%)   | 1564 (32.6%)   | 1735 (36.2%)   |

**Table S16:** Baseline characteristics of UK Biobank participants with commuting transport information and who commuted at least once per week (n = 23,999) by quintiles of *ground-cover walkability*; all study participants resided within Greater London administrative boundaries at study baseline (2006-2010).

|                                | Ground-cover walkability quintiles |                |                |                |                |
|--------------------------------|------------------------------------|----------------|----------------|----------------|----------------|
|                                | Q1<br>(N=4806)                     | Q2<br>(N=4799) | Q3<br>(N=4795) | Q4<br>(N=4799) | Q5<br>(N=4800) |
| <b>Age at baseline (years)</b> |                                    |                |                |                |                |
| Mean (SD)                      | 53.9 (7.21)                        | 52.6 (7.29)    | 52.5 (7.36)    | 52.3 (7.31)    | 52.4 (7.41)    |
| <b>Sex</b>                     |                                    |                |                |                |                |
| Female                         | 2627 (54.7%)                       | 2528 (52.7%)   | 2548 (53.1%)   | 2588 (53.9%)   | 2634 (54.9%)   |
| Male                           | 2179 (45.3%)                       | 2271 (47.3%)   | 2247 (46.9%)   | 2211 (46.1%)   | 2166 (45.1%)   |



| Average total household income before tax (£)               |              |              |              |              |              |
|-------------------------------------------------------------|--------------|--------------|--------------|--------------|--------------|
| Less than 18,000                                            | 232 (4.8%)   | 358 (7.5%)   | 425 (8.9%)   | 428 (8.9%)   | 387 (8.1%)   |
| 18,000 to 30,999                                            | 651 (13.5%)  | 770 (16.0%)  | 880 (18.4%)  | 873 (18.2%)  | 811 (16.9%)  |
| 31,000 to 51,999                                            | 1167 (24.3%) | 1239 (25.8%) | 1255 (26.2%) | 1196 (24.9%) | 1105 (23.0%) |
| 52,000 to 100,000                                           | 1617 (33.6%) | 1390 (29.0%) | 1187 (24.8%) | 1188 (24.8%) | 1261 (26.3%) |
| Greater than 100,000                                        | 652 (13.6%)  | 582 (12.1%)  | 532 (11.1%)  | 628 (13.1%)  | 825 (17.2%)  |
| Missing                                                     | 487 (10.1%)  | 460 (9.6%)   | 516 (10.8%)  | 486 (10.1%)  | 411 (8.6%)   |
| Index of Multiple Deprivation (small-area level)            |              |              |              |              |              |
| Low deprivation                                             | 319 (6.6%)   | 786 (16.4%)  | 1114 (23.2%) | 1576 (32.8%) | 2346 (48.9%) |
| Medium deprivation                                          | 1546 (32.2%) | 2200 (45.8%) | 2456 (51.2%) | 2445 (50.9%) | 2020 (42.1%) |
| High deprivation                                            | 2941 (61.2%) | 1813 (37.8%) | 1225 (25.5%) | 778 (16.2%)  | 434 (9.0%)   |
| IPAQ activity group                                         |              |              |              |              |              |
| Low                                                         | 780 (16.2%)  | 714 (14.9%)  | 699 (14.6%)  | 672 (14.0%)  | 554 (11.5%)  |
| Moderate                                                    | 1834 (38.2%) | 1782 (37.1%) | 1773 (37.0%) | 1767 (36.8%) | 1903 (39.6%) |
| High                                                        | 1511 (31.4%) | 1583 (33.0%) | 1568 (32.7%) | 1620 (33.8%) | 1699 (35.4%) |
| Missing                                                     | 681 (14.2%)  | 720 (15.0%)  | 755 (15.7%)  | 740 (15.4%)  | 644 (13.4%)  |
| Achieved UK physical activity recommendations via MVPA only |              |              |              |              |              |
| Yes                                                         | 3346 (69.6%) | 3337 (69.5%) | 3327 (69.4%) | 3393 (70.7%) | 3581 (74.6%) |
| No                                                          | 778 (16.2%)  | 741 (15.4%)  | 712 (14.8%)  | 665 (13.9%)  | 575 (12.0%)  |
| Missing                                                     | 682 (14.2%)  | 721 (15.0%)  | 756 (15.8%)  | 741 (15.4%)  | 644 (13.4%)  |
| Achieved UK physical activity recommendations via MVPA only |              |              |              |              |              |
| Yes                                                         | 2045 (42.6%) | 2110 (44.0%) | 2081 (43.4%) | 2145 (44.7%) | 2276 (47.4%) |
| No                                                          | 2080 (43.3%) | 1969 (41.0%) | 1959 (40.9%) | 1914 (39.9%) | 1880 (39.2%) |
| Missing                                                     | 681 (14.2%)  | 720 (15.0%)  | 755 (15.7%)  | 740 (15.4%)  | 644 (13.4%)  |
| Non-commuting transport                                     |              |              |              |              |              |
| Car/motor vehicle                                           | 3604 (75.0%) | 3101 (64.6%) | 2851 (59.5%) | 2526 (52.6%) | 1939 (40.4%) |
| Cycle                                                       | 61 (1.3%)    | 130 (2.7%)   | 121 (2.5%)   | 136 (2.8%)   | 228 (4.8%)   |
| Walk                                                        | 694 (14.4%)  | 994 (20.7%)  | 1098 (22.9%) | 1294 (27.0%) | 1681 (35.0%) |
| Public transport                                            | 437 (9.1%)   | 554 (11.5%)  | 710 (14.8%)  | 829 (17.3%)  | 944 (19.7%)  |
| Missing                                                     | 10 (0.2%)    | 20 (0.4%)    | 15 (0.3%)    | 14 (0.3%)    | 8 (0.2%)     |
| Commuting transport                                         |              |              |              |              |              |
| Car/motor vehicle                                           | 2987 (62.2%) | 2617 (54.5%) | 2378 (49.6%) | 1980 (41.3%) | 1412 (29.4%) |
| Cycle                                                       | 116 (2.4%)   | 197 (4.1%)   | 180 (3.8%)   | 235 (4.9%)   | 349 (7.3%)   |
| Walk                                                        | 670 (13.9%)  | 770 (16.0%)  | 852 (17.8%)  | 1001 (20.9%) | 1346 (28.0%) |
| Public transport                                            | 1033 (21.5%) | 1215 (25.3%) | 1385 (28.9%) | 1583 (33.0%) | 1693 (35.3%) |

**Table S17:** Baseline characteristics of UK Biobank participants with commuting transport information and who commuted at least once per week ( $n = 23,999$ ) by quintiles of *tree-cover walkability*; all study participants resided within Greater London administrative boundaries at study baseline (2006-2010).

|                                                  | Ground-cover walkability quintiles |              |              |              |              |
|--------------------------------------------------|------------------------------------|--------------|--------------|--------------|--------------|
|                                                  | Q1                                 | Q2           | Q3           | Q4           | Q5           |
|                                                  | (N=4806)                           | (N=4799)     | (N=4795)     | (N=4799)     | (N=4800)     |
| Age at baseline (years)                          |                                    |              |              |              |              |
| Mean (SD)                                        | 53.9 (7.21)                        | 52.6 (7.29)  | 52.5 (7.36)  | 52.3 (7.31)  | 52.4 (7.41)  |
| Sex                                              |                                    |              |              |              |              |
| Female                                           | 2627 (54.7%)                       | 2528 (52.7%) | 2548 (53.1%) | 2588 (53.9%) | 2634 (54.9%) |
| Male                                             | 2179 (45.3%)                       | 2271 (47.3%) | 2247 (46.9%) | 2211 (46.1%) | 2166 (45.1%) |
| Average total household income before tax (£)    |                                    |              |              |              |              |
| Less than 18,000                                 | 232 (4.8%)                         | 358 (7.5%)   | 425 (8.9%)   | 428 (8.9%)   | 387 (8.1%)   |
| 18,000 to 30,999                                 | 651 (13.5%)                        | 770 (16.0%)  | 880 (18.4%)  | 873 (18.2%)  | 811 (16.9%)  |
| 31,000 to 51,999                                 | 1167 (24.3%)                       | 1239 (25.8%) | 1255 (26.2%) | 1196 (24.9%) | 1105 (23.0%) |
| 52,000 to 100,000                                | 1617 (33.6%)                       | 1390 (29.0%) | 1187 (24.8%) | 1188 (24.8%) | 1261 (26.3%) |
| Greater than 100,000                             | 652 (13.6%)                        | 582 (12.1%)  | 532 (11.1%)  | 628 (13.1%)  | 825 (17.2%)  |
| Missing                                          | 487 (10.1%)                        | 460 (9.6%)   | 516 (10.8%)  | 486 (10.1%)  | 411 (8.6%)   |
| Index of Multiple Deprivation (small-area level) |                                    |              |              |              |              |
| Low deprivation                                  | 319 (6.6%)                         | 786 (16.4%)  | 1114 (23.2%) | 1576 (32.8%) | 2346 (48.9%) |
| Medium deprivation                               | 1546 (32.2%)                       | 2200 (45.8%) | 2456 (51.2%) | 2445 (50.9%) | 2020 (42.1%) |
| High deprivation                                 | 2941 (61.2%)                       | 1813 (37.8%) | 1225 (25.5%) | 778 (16.2%)  | 434 (9.0%)   |
| IPAQ activity group                              |                                    |              |              |              |              |
| Low                                              | 780 (16.2%)                        | 714 (14.9%)  | 699 (14.6%)  | 672 (14.0%)  | 554 (11.5%)  |
| Moderate                                         | 1834 (38.2%)                       | 1782 (37.1%) | 1773 (37.0%) | 1767 (36.8%) | 1903 (39.6%) |

|                                                                    |              |              |              |              |              |
|--------------------------------------------------------------------|--------------|--------------|--------------|--------------|--------------|
| High                                                               | 1511 (31.4%) | 1583 (33.0%) | 1568 (32.7%) | 1620 (33.8%) | 1699 (35.4%) |
| Missing                                                            | 681 (14.2%)  | 720 (15.0%)  | 755 (15.7%)  | 740 (15.4%)  | 644 (13.4%)  |
| <b>Achieved UK physical activity recommendations via MVPA only</b> |              |              |              |              |              |
| Yes                                                                | 3346 (69.6%) | 3337 (69.5%) | 3327 (69.4%) | 3393 (70.7%) | 3581 (74.6%) |
| No                                                                 | 778 (16.2%)  | 741 (15.4%)  | 712 (14.8%)  | 665 (13.9%)  | 575 (12.0%)  |
| Missing                                                            | 682 (14.2%)  | 721 (15.0%)  | 756 (15.8%)  | 741 (15.4%)  | 644 (13.4%)  |
| <b>Achieved UK physical activity recommendations via MVPA only</b> |              |              |              |              |              |
| Yes                                                                | 2045 (42.6%) | 2110 (44.0%) | 2081 (43.4%) | 2145 (44.7%) | 2276 (47.4%) |
| No                                                                 | 2080 (43.3%) | 1969 (41.0%) | 1959 (40.9%) | 1914 (39.9%) | 1880 (39.2%) |
| Missing                                                            | 681 (14.2%)  | 720 (15.0%)  | 755 (15.7%)  | 740 (15.4%)  | 644 (13.4%)  |
| <b>Non-commuting transport</b>                                     |              |              |              |              |              |
| Car/motor vehicle                                                  | 3604 (75.0%) | 3101 (64.6%) | 2851 (59.5%) | 2526 (52.6%) | 1939 (40.4%) |
| Cycle                                                              | 61 (1.3%)    | 130 (2.7%)   | 121 (2.5%)   | 136 (2.8%)   | 228 (4.8%)   |
| Walk                                                               | 694 (14.4%)  | 994 (20.7%)  | 1098 (22.9%) | 1294 (27.0%) | 1681 (35.0%) |
| Public transport                                                   | 437 (9.1%)   | 554 (11.5%)  | 710 (14.8%)  | 829 (17.3%)  | 944 (19.7%)  |
| Missing                                                            | 10 (0.2%)    | 20 (0.4%)    | 15 (0.3%)    | 14 (0.3%)    | 8 (0.2%)     |
| <b>Commuting transport</b>                                         |              |              |              |              |              |
| Car/motor vehicle                                                  | 2987 (62.2%) | 2617 (54.5%) | 2378 (49.6%) | 1980 (41.3%) | 1412 (29.4%) |
| Cycle                                                              | 116 (2.4%)   | 197 (4.1%)   | 180 (3.8%)   | 235 (4.9%)   | 349 (7.3%)   |
| Walk                                                               | 670 (13.9%)  | 770 (16.0%)  | 852 (17.8%)  | 1001 (20.9%) | 1346 (28.0%) |
| Public transport                                                   | 1033 (21.5%) | 1215 (25.3%) | 1385 (28.9%) | 1583 (33.0%) | 1693 (35.3%) |
